# Supplementary material for: An efficient and practical aerobic oxidation of benzylic methylenes by recyclable N-hydroxyimide
Source: Royal Society of Chemistry journal article supplement (doi:10.1039/d0ra10475b), 2021-01-01
Supplement: d0ra10475b1.pdf [file d0ra10475b1.pdf]

# **An efficient and practical aerobic oxidation of benzylic methylenes by recyclable **N-hydroxyimide****

*Jian Wang,<sup>a\*#</sup> Cheng Zhang,<sup>b#</sup> Xiao-Qing Ye<sup>a</sup>, Wenting Du,<sup>a\*</sup> Shenxin Zeng,<sup>a</sup> Jian-Hong Xu<sup>a</sup> and Hong Yin<sup>a\*</sup>*

<sup>a</sup>School of Pharmacy, Hangzhou Medical College No. 481 Binwen Road, Binjiang District, Hangzhou 310053, China

<sup>b</sup>College of Pharmaceutical Science, Zhejiang University of technology, No. 18 Chaowang Road, Hangzhou 310000, China

<sup>#</sup>These authors contributed equally to this work

## Supplementary Information

### Table of Contents

|                                                                                                         |            |
|---------------------------------------------------------------------------------------------------------|------------|
| <b>Table S1. Screen of iron salts</b> .....                                                             | <b>S3</b>  |
| <b>Table S2. Screen of solvents</b> .....                                                               | <b>S3</b>  |
| <b>Figure S1. Structure of screened NHIs</b> .....                                                      | <b>S4</b>  |
| <b>Table S3. Screen of NHIs</b> .....                                                                   | <b>S4</b>  |
| <b>Figure S2. Linear fitted curve equation of NHPI/internal standard</b> .....                          | <b>S5</b>  |
| <b>Figure S3. Linear fitted curve equation of NHSI/internal standard</b> .....                          | <b>S5</b>  |
| <b>Table S4. Further optimization of Fe(NO<sub>3</sub>)<sub>3</sub>/NHSI/O<sub>2</sub> system</b> ..... | <b>S6</b>  |
| <b>Table S5. Controlled experiments of EB oxidation</b> .....                                           | <b>S6</b>  |
| <b>Product characterization</b> .....                                                                   | <b>S7</b>  |
| <b>NMR Spectrum of products</b> .....                                                                   | <b>S9</b>  |
| <b>References</b> .....                                                                                 | <b>S29</b> |

**Table S1. Screen of iron salts<sup>a</sup>**

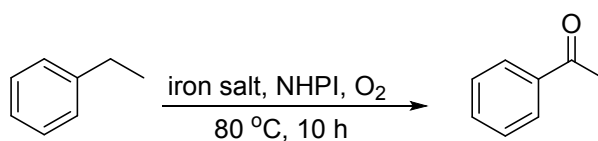

| Entry | Catalyst                                                          | Conversion (%) <sup>b</sup> |
|-------|-------------------------------------------------------------------|-----------------------------|
| 1     | Iron tristearate                                                  | 78                          |
| 2     | Fe(acac) <sub>3</sub>                                             | 73                          |
| 3     | Fe(NH <sub>4</sub> ) <sub>2</sub> (SO <sub>4</sub> ) <sub>2</sub> | trace                       |
| 4     | FeOH(CH <sub>3</sub> COO) <sub>2</sub>                            | 80                          |
| 5     | FeCl <sub>3</sub>                                                 | trace                       |
| 6     | Fe(NO <sub>3</sub> ) <sub>3</sub> ·9H <sub>2</sub> O              | 83                          |
| 7     | Fe <sub>2</sub> (SO <sub>4</sub> ) <sub>3</sub> <sup>c</sup>      | 69                          |

<sup>a</sup>Reaction conditions: 2 mmol ethylbenzene and 10 mol % metal salts, 10 mol % NHPI in 2 mL AcOH are stirred at 100°C oil bath for 10 h.

<sup>b</sup>Conversion is determined by GC.

<sup>c</sup>5 mol% Fe<sub>2</sub>(SO<sub>4</sub>)<sub>3</sub> was added.

**Table S2.** Screen of solvents<sup>a</sup>

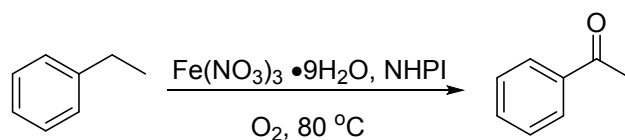

| Entry | Solvent            | Conversion (%) <sup>b</sup> |
|-------|--------------------|-----------------------------|
| 1     | AcOH               | 23                          |
| 2     | Chlorobenzene      | trace                       |
| 3     | Cyclohexanone      | 9                           |
| 4     | EtOAc <sup>c</sup> | 11                          |
| 5     | EtOH <sup>c</sup>  | <5                          |
| 6     | CH <sub>3</sub> CN | 41                          |
| 7     | PhCN               | 57                          |
| 8     | DMF                | trace                       |
| 9     | DMSO               | <5                          |
| 10    | Toluene            | 19                          |
| 11    | n-Butanol          | <5                          |
| 12    | t-Butanol          | <5                          |

<sup>a</sup>2 mmol ethylbenzene, 5 mol % metal salts, 5 mol % NHPI in 2 mL solvents are stirred at 80 °C oil bath for 10 h.

<sup>b</sup>Conversion is determined by GC.

<sup>c</sup>Reaction mixture was stirred at refluxing condition.

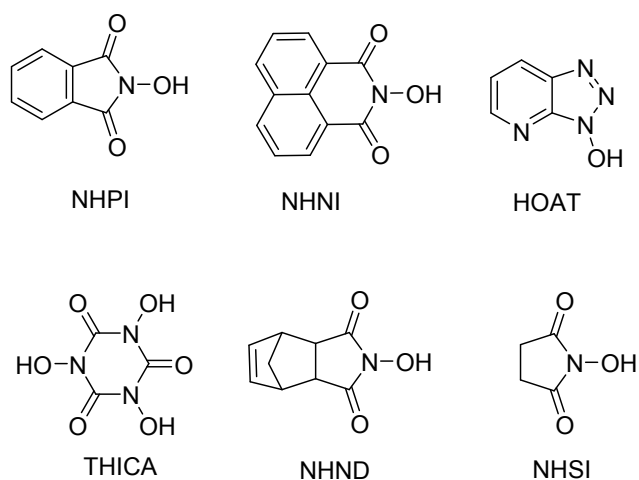

**Figure S1.** Structure of screened NHIs

**Table S3.** Screen of NHIs<sup>a</sup>

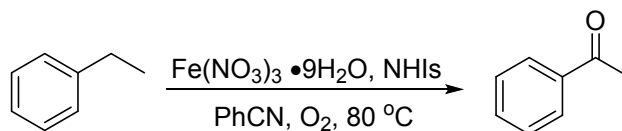

| Entry | NHIs  | Conversion (%) <sup>b</sup> |
|-------|-------|-----------------------------|
| 1     | NHPI  | 99                          |
| 2     | NHNI  | 44                          |
| 3     | NHND  | 11                          |
| 4     | NHSI  | 97                          |
| 5     | HOAT  | <5                          |
| 6     | THICA | 38                          |

<sup>a</sup> Reaction conditions: 2 mmol ethylbenzene and 5 mol % metal salts, 5 mol % NHIs in 2 mL PhCN are stirred in 90 °C oil bath for 10 h.

<sup>b</sup> Conversion is determined by GC with diphenyl ether as internal standard.

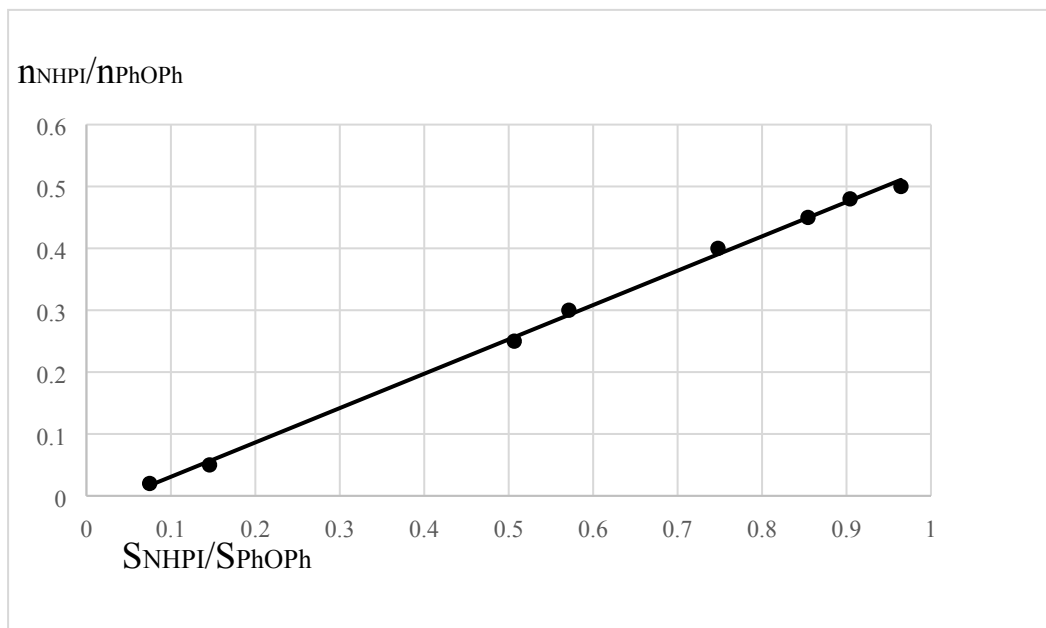

**Figure S2.** Linear regression line and regression equation of NHPI/internal standard when molar raion of NHPI : PhOPh = 0.02 - 0.50)

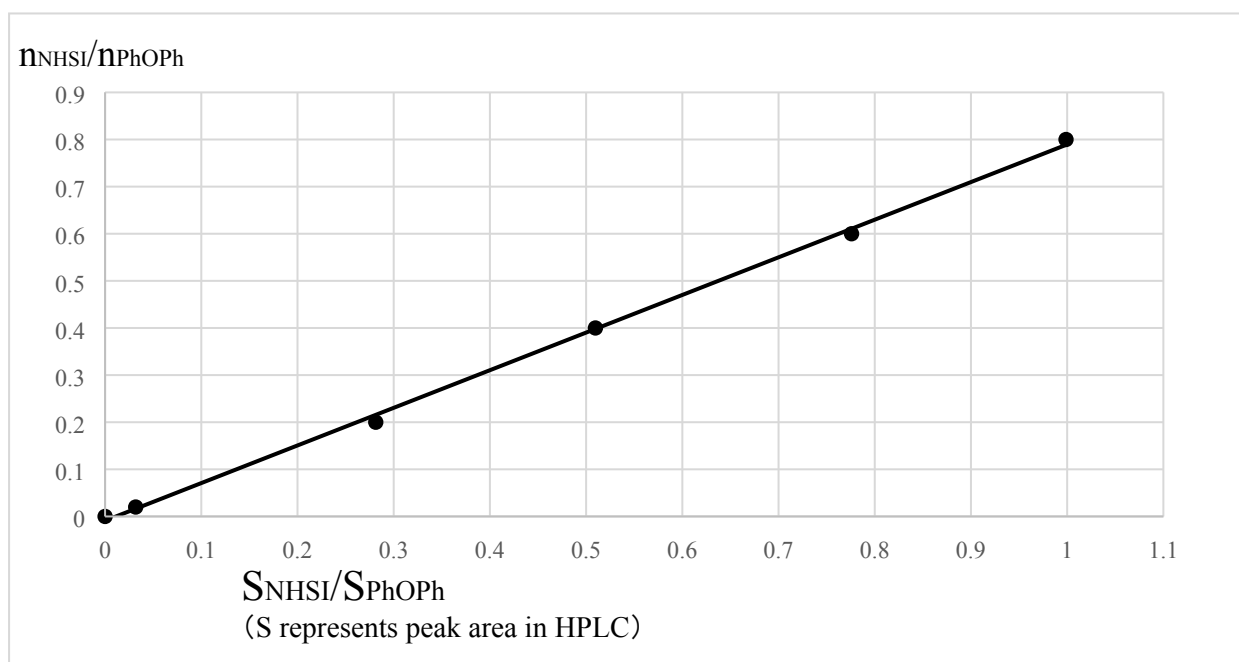

**Figure S3.** Linear regression line and regression equation of NHSI/internal standard when molar ratio of NHSI : PhOPh = 0.00 - 0.80)

**Table S4.** Further optimization of Fe(NO<sub>3</sub>)<sub>3</sub>/NHSI/O<sub>2</sub> system<sup>a</sup>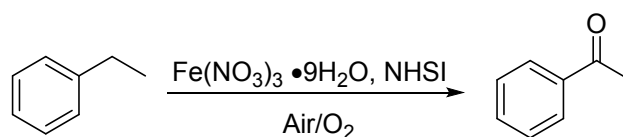

| Entry           | Fe(NO <sub>3</sub> ) <sub>3</sub> ·9H <sub>2</sub> O (mol%) | NHSI (mol%) | PhCN (mL) | T (°C) | Oxygen Source <sup>b</sup> | Time (h) | Yield <sup>c</sup> (%) |
|-----------------|-------------------------------------------------------------|-------------|-----------|--------|----------------------------|----------|------------------------|
| 1               | 5                                                           | 5           | 2         | 90     | A                          | 10       | 93                     |
| 2               | 3                                                           | 3           | 2         | 90     | A                          | 18       | 93                     |
| 3               | 1                                                           | 1           | 2         | 90     | A                          | 24       | 57                     |
| 4               | 1                                                           | 1           | 2         | 100    | A                          | 48       | 68                     |
| 5               | 1                                                           | 2           | 2         | 100    | A                          | 48       | 77                     |
| 6               | 2                                                           | 2           | 2         | 100    | A                          | 24       | 83                     |
| 7               | 1                                                           | 3           | 2         | 100    | A                          | 12       | 86                     |
| 8               | 1                                                           | 3           | 2         | 90     | A                          | 18       | 86                     |
| 9               | 1                                                           | 3           | 2         | 80     | A                          | 48       | 63                     |
| 10              | 1                                                           | 3           | 1         | 90     | A                          | 16       | 86                     |
| 11              | 1                                                           | 3           | 0.5       | 90     | A                          | 48       | 61                     |
| 12              | 1                                                           | 3           | 1         | 90     | B                          | 14       | 90                     |
| 13              | 1                                                           | 3           | 1         | 90     | C                          | 16       | 90                     |
| 14 <sup>d</sup> | 1                                                           | 3           | 1         | 90     | B                          | 16       | 89                     |

<sup>a</sup>Reaction conditions: 2 mmol ethylbenzene, Fe(NO<sub>3</sub>)<sub>3</sub>·9H<sub>2</sub>O and NHSI in PhCN are stirred in 90 °C oil bath.

<sup>b</sup>Oxygen source condition: A: Air (open system); B: O<sub>2</sub> Balloon without purging; C: O<sub>2</sub> balloon with purging (replacing original air in system with pure O<sub>2</sub>).

<sup>c</sup>Determined by GC with diphenyl ether as internal standard.

<sup>d</sup>20 mmol% KPF<sub>6</sub> was added as additive.

**Table S5.** Controlled experiments of EB oxidation<sup>a</sup>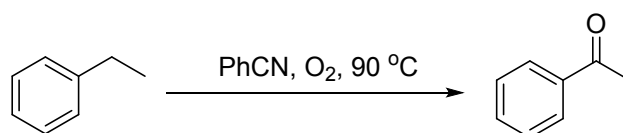

| Entry          | Catalyst                                                | Additive | Conversion <sup>b</sup> |
|----------------|---------------------------------------------------------|----------|-------------------------|
| 1              | 5 mol% Fe(NO <sub>3</sub> ) <sub>3</sub><br>5 mol% NHSI | \        | 98                      |
| 2 <sup>c</sup> | 5 mol% Fe(NO <sub>3</sub> ) <sub>3</sub><br>5 mol% NHSI | \        | 98                      |
| 3              | 2 mol% Fe(NO <sub>3</sub> ) <sub>3</sub>                | \        | 79                      |

|    |                                                                         |              |       |
|----|-------------------------------------------------------------------------|--------------|-------|
|    | 5 mol% NHSI                                                             |              |       |
| 4  | 5 mol% NHSI                                                             | \            | 54    |
| 5  | 5 mol% Fe(NO <sub>3</sub> ) <sub>3</sub>                                | \            | trace |
| 6  | 5 mol% Fe(NO <sub>3</sub> ) <sub>3</sub><br>1 mol% NHSI                 | \            | 21    |
| 7  | 2.5 mol% Fe <sub>2</sub> (SO <sub>4</sub> ) <sub>3</sub><br>5 mol% NHSI | \            | 71    |
| 8  | 15 mol% NaNO <sub>3</sub><br>5 mol% NHSI                                | \            | 57    |
| 9  | 5 mol% Fe(NO <sub>3</sub> ) <sub>3</sub><br>5 mol% NHSI                 | 5 mol% BHT   | 79    |
| 10 | 5 mol% Fe(NO <sub>3</sub> ) <sub>3</sub><br>5 mol% NHSI                 | 20 mol% BHT  | 53    |
| 11 | 5 mol% Fe(NO <sub>3</sub> ) <sub>3</sub><br>5 mol% NHSI                 | 100 mol% BHT | trace |

<sup>a</sup>Reaction conditions: 2 mmol ethylbenzene, catalyst, additive in 1 mL PhCN with O<sub>2</sub> balloon are stirred in 90 °C oil bath for 24 h.

<sup>b</sup>Conversion was determined by GC.

<sup>c</sup>Reaction flask was tightly wrapped by aluminum foil to avoid any visible light.

### Product characterization

**Benzophenone**<sup>[1]</sup> (**2a**). Compound **2a** was obtained as white solid (357 mg, 98% yield). m. p. 48-49 °C (lit.<sup>[1]</sup> 47-49 °C) <sup>1</sup>H NMR (500 MHz, Chloroform-*d*) δ 7.84 – 7.82 (m, 4H), 7.60 (tt, 2H, *J* = 7.5, 1.5 Hz), 7.52 – 7.48 (m, 4H). <sup>13</sup>C NMR (125 MHz, Chloroform-*d*) δ 196.8, 137.6, 132.4, 130.1, 128.3.

**4-Chlorobenzophenone**<sup>[2]</sup> (**2b**). Compound **2b** was obtained as white solid (359 mg, 83% yield). m. p. 75-76 °C (lit.<sup>[2]</sup> 75-77 °C) <sup>1</sup>H NMR (500 MHz, Chloroform-*d*) δ 7.80-7.76 (m, 4H), 7.62 (tt, *J* = 7.5 Hz, 1.5 Hz, 1H), 7.53-7.47 (m, 4H). <sup>13</sup>C NMR (125 MHz, Chloroform-*d*) δ 195.5, 138.9, 137.3, 135.9, 132.7, 131.5, 129.9, 128.7, 128.4.

**9-Fluorenone**<sup>[1]</sup> (**2c**). Compound **2c** was obtained as yellow solid (349 mg, 97% yield). m. p. 83-84 °C (lit.<sup>[5]</sup> 84-86 °C) <sup>1</sup>H NMR (500 MHz, Chloroform-*d*) δ 7.66 (dt, *J* = 7.5 Hz, 1 Hz, 2H), 7.51 (dt, *J* = 7.5 Hz, 1 Hz, 2H), 7.48 (dt, *J* = 7.5, 1.5 Hz, 2H), 7.29 (td, *J* = 7.5 Hz, 1.5 Hz, 2H). <sup>13</sup>C NMR (125 MHz, Chloroform-*d*) δ 193.9, 144.4, 134.7, 134.1, 129.0, 124.3, 120.3.

**9-Xanthenone**<sup>[3][4]</sup> (**2d**). Compound **2d** was obtained as white solid (384 mg, 98% yield). m. p. 170-172 °C (lit.<sup>[3]</sup> 168-170 °C) <sup>1</sup>H NMR (500 MHz, Chloroform-*d*) δ 8.33 (dd, *J* = 8.0 Hz, 1.5 Hz, 2H), 7.72 – 7.69 (m, 2H), 7.47 (d, *J* = 8.5 Hz, 2H), 7.38 – 7.35 (m, 2H). <sup>13</sup>C NMR (125 MHz, Chloroform-*d*) δ 177.1, 156.1, 134.7, 126.7, 123.9, 121.8, 117.9.

**1-[4-(4-Pyridinyl)phenyl]ethenone**<sup>[5]</sup> (**2e**). Compound **2e** was obtained as off-white solid (362 mg, 99% yield). m. p. 71-72 °C (lit.<sup>[5]</sup> 71-72 °C) <sup>1</sup>H NMR (600 MHz, Chloroform-*d*) δ 8.82 (d, *J* = 6 Hz, 2H), 7.83 (d, *J* = 7.2 Hz, 2H), 7.66 (t, *J* = 7.8 Hz, 1H), 7.59 (d, *J* = 6 Hz, 2H), 7.53 (t, *J* = 7.8 Hz, 2H). <sup>13</sup>C NMR (150 MHz, Chloroform-*d*) δ 195.1, 150.3, 144.4, 135.9, 133.6, 130.1, 128.7, 122.9.

**1-Tetralone**<sup>[1]</sup> (**2f**). Compound **2f** was obtained as light yellow liquid (289 mg, 99% yield). <sup>1</sup>H NMR (500 MHz, Chloroform-*d*) δ 7.98 (dd, *J* = 8.0 Hz, 1.5 Hz, 1H), 7.40 (td, *J* = 7.5 Hz, 1.5 Hz, 1H), 7.24 (t, *J* = 7.5 Hz, 1H), 7.19 (d, *J* = 7.5 Hz, 1H), 2.90 (t, *J* = 6.5 Hz, 1H), 2.59 (t, *J* = 6.5 Hz, 1H), 2.10-2.03 (m, 1H). <sup>13</sup>C NMR (125 MHz, Chloroform-*d*) δ 197.9, 144.2, 133.1, 132.4, 128.6, 126.8, 126.3, 38.9, 29.4, 23.1.

**1-Indanone**<sup>[1]</sup> (**2g**). Compound **2g** was obtained as light yellow solid (230 mg, 87% yield). m. p. 39-41 °C (lit.<sup>[1]</sup> 40-42 °C) <sup>1</sup>H NMR (500 MHz, Chloroform-*d*) δ 7.76 (d, *J* = 7.5 Hz, 1H), 7.59 (td, *J* = 7.5 Hz, 1.0 Hz, 1H), 7.49 (dt, *J* = 8 Hz, 1.0 Hz, 1H), 7.39-7.36 (m, 1H), 3.15 (t, *J* = 6 Hz, 2H), 2.70 (t, *J* = 6 Hz, 3H). <sup>13</sup>C NMR (125 MHz, Chloroform-*d*) δ 207.1, 155.1, 137.0, 134.6, 127.2, 126.7, 123.7, 36.2, 25.8.

**3,4-dihydro-1H-2-benzopyran-1-one**<sup>[6]</sup> (**2h**). Compound **2h** was obtained as light yellow liquid. <sup>1</sup>H NMR (500 MHz, Chloroform-*d*) δ 8.04 (d, *J* = 7.5 Hz, 1H), 7.51 (tt, *J* = 7.5 Hz, 1.2 Hz, 1H), 7.35 (t, *J* = 7.5 Hz, 1H), 7.24 (d, *J* = 7.5 Hz, 1H), 4.50 (t, *J* = 5.5 Hz, 2H), 3.03 (t, *J* = 6.0 Hz, 2H). <sup>13</sup>C NMR (125 MHz, Chloroform-*d*) δ 165.0, 139.5, 133.5, 130.1, 127.5, 127.2, 125.1, 67.2, 27.6.

**Acetophenone**<sup>[1]</sup> (**2i**). Compound **2i** was obtained as light yellow liquid (204 mg, 85% yield). <sup>1</sup>H NMR (500 MHz, Chloroform-*d*) δ 7.93-7.91 (m, 2H), 7.52 (tt, *J* = 7.5, 1.5 Hz, 1H), 7.43 – 7.40 (m, 2H), 2.55 (s, 3H). <sup>13</sup>C NMR (125 MHz, Chloroform-*d*) δ 198.06, 137.09, 133.09, 128.55, 128.28, 26.54.

**n-Butyrophenone**<sup>[6]</sup> (**2j**). Compound **2j** was obtained as light yellow liquid (269 mg, 91% yield). <sup>1</sup>H NMR (500 MHz, Chloroform-*d*) δ 7.95-7.93 (m, 2H), 7.51 (tt, *J* = 7.5 Hz, 1.5 Hz, 1H), 7.42 (t, *J* = 7.5 Hz, 2H), 2.91 (t, *J* = 7.5 Hz, 2H), 1.75 (sext, *J* = 7.5 Hz, 2H), 0.98 (t, *J* = 7.5 Hz, 3H). <sup>13</sup>C NMR (125 MHz, Chloroform-*d*) δ 200.02, 136.92, 132.61, 129.31, 40.23, 17.53, 13.64.

**2'-Bromoacetophenone**<sup>[7]</sup> (**2k**). Compound **2k** was obtained as light yellow liquid (394 mg, 99% yield). <sup>1</sup>H NMR (500 MHz, Chloroform-*d*) δ 7.57 (dd, *J* = 8 Hz, 1 Hz, 1H), 7.43 (dd, *J* = 7.5 Hz, 2 Hz, 1H), 7.33 (td, *J* = 7.5 Hz, 1 Hz, 1H), 7.26 (td, *J* = 8 Hz, 1.5 Hz, 1H), 2.59 (s, 3H). <sup>13</sup>C NMR (125 MHz, Chloroform-*d*) δ 201.1, 141.3, 133.7, 131.7, 128.8, 127.3, 118.7, 30.1.

**4'-Bromoacetophenone**<sup>[1]</sup> (**2l**). Compound **2l** was obtained as light yellow solid (386 mg, 97% yield). m. p. 51-52 °C (lit.<sup>[1]</sup> 48-50 °C) <sup>1</sup>H NMR (500 MHz, Chloroform-*d*) δ 7.83 (d, *J* = 8.5 Hz, 1H), 7.61 (d, *J* = 8.5 Hz, 1H), 2.59 (s, 3H). <sup>13</sup>C NMR (125 MHz, Chloroform-*d*) δ 197.0, 135.9, 131.9, 129.8, 128.3, 26.5.

**2-Bromoacetophenone**<sup>[8]</sup> (**2m**). Compound **2m** was obtained as off-white solid (394 mg, 99% yield). m. p. 46-47 °C (lit.<sup>[8]</sup> 46-48 °C) <sup>1</sup>H NMR (500 MHz, Chloroform-*d*) δ 8.01-7.99 (m, 2H), 7.62 (tt, *J* = 7.5 Hz, 1.5 Hz, 1H), 7.53-7.49 (m, 2H), 4.47 (s, 2H). <sup>13</sup>C NMR (125 MHz, Chloroform-*d*) δ 191.3, 134.0, 133.9, 128.9, 30.9.

**4'-Cyanoacetophenone**<sup>[9]</sup> (**2n**). Compound **2n** was obtained as white solid (200 mg, 69% yield). m. p. 57-59 °C (lit.<sup>[21]</sup> 59-60 °C) <sup>1</sup>H NMR (500 MHz, Chloroform-*d*) δ 8.05 (d, *J* = 8 Hz, 2H), 7.78 (d, *J* = 8.5 Hz, 2H), 2.65 (s, 3H). <sup>13</sup>C NMR (125 MHz, Chloroform-*d*) δ 196.5, 139.9, 132.5, 128.7, 117.9, 116.4, 26.7.

**4'-Nitroacetophenone**<sup>[1]</sup> (**2o**). Compound **2o** was obtained as yellow solid (280 mg, 85% yield). m. p. 78-79 °C (lit.<sup>[1]</sup> 80-81 °C) <sup>1</sup>H NMR (500 MHz, Chloroform-*d*) δ



8.30 (dt,  $J = 9$ , 2 Hz, 2H), 8.10 (dt,  $J = 9$ , 2 Hz, 2H), 2.68 (s, 3H).  $^{13}\text{C}$  NMR (125 MHz, Chloroform-*d*)  $\delta$  196.3, 150.3, 141.4, 129.3, 123.8, 26.9.

**4'-Ethylacetophenone**<sup>[10]</sup> (**2p**). Compound **2p** was obtained as light yellow liquid (97 mg, 33 % yield).  $^1\text{H}$  NMR (500 MHz, Chloroform-*d*)  $\delta$  7.89 (d,  $J = 8.0$  Hz, 2H), 7.28 (d,  $J = 8.0$  Hz, 2H), 2.71 (q,  $J = 7.5$  Hz, 2H), 2.58 (s, 3H), 1.26 (t,  $J = 7.5$  Hz, 3H).  $^{13}\text{C}$  NMR (125 MHz, Chloroform-*d*)  $\delta$  197.8, 150.0, 134.9, 128.5, 128.0, 28.9, 26.5, 15.1.

**4'-Methylacetophenone**<sup>[11]</sup> (**2q**). Compound **2q** was obtained as light yellow liquid (99 mg, 37 % yield).  $^1\text{H}$  NMR (500 MHz, Chloroform-*d*)  $\delta$  7.84 (d,  $J = 8.5$  Hz, 2H), 7.24 (d,  $J = 8$  Hz, 2H), 2.55 (s, 3H), 2.39 (s, 3H).  $^{13}\text{C}$  NMR (150 MHz, Chloroform-*d*)  $\delta$  197.6, 143.7, 134.6, 129.1, 128.3, 26.3, 21.5.

**4'-Acetoxyacetophenone**<sup>[12][13]</sup> (**2r**). Compound **2r** was obtained as off-white solid (238 mg, 67 % yield). m. p. 51-52 °C (lit.<sup>[12]</sup> 52-54 °C).  $^1\text{H}$  NMR (500 MHz, Chloroform-*d*)  $\delta$  7.89-7.83 (m, 2H), 7.10-7.05 (m, 2H), 2.45 (s, 1H), 2.19 (s, 1H).  $^{13}\text{C}$  NMR (125 MHz, Chloroform-*d*)  $\delta$  196.4, 168.5, 154.1, 134.4, 129.6, 121.5, 26.6, 20.7.

**4'-Methoxyacetophenone**<sup>[11]</sup> (**2s**). Compound **2s** was obtained as light yellow liquid (105 mg, 35 % yield).  $^1\text{H}$  NMR (600 MHz, Chloroform-*d*)  $\delta$  7.75-7.72 (m, 2H), 6.75-6.72 (m, 2H), 3.66-3.65 (m, 3H), 2.35-2.34 (m, 3H).  $^{13}\text{C}$  NMR (150 MHz, Chloroform-*d*)  $\delta$  196.4, 163.3, 130.4, 113.5, 55.2, 26.1.

## NMR Spectrum of products

**2a:**

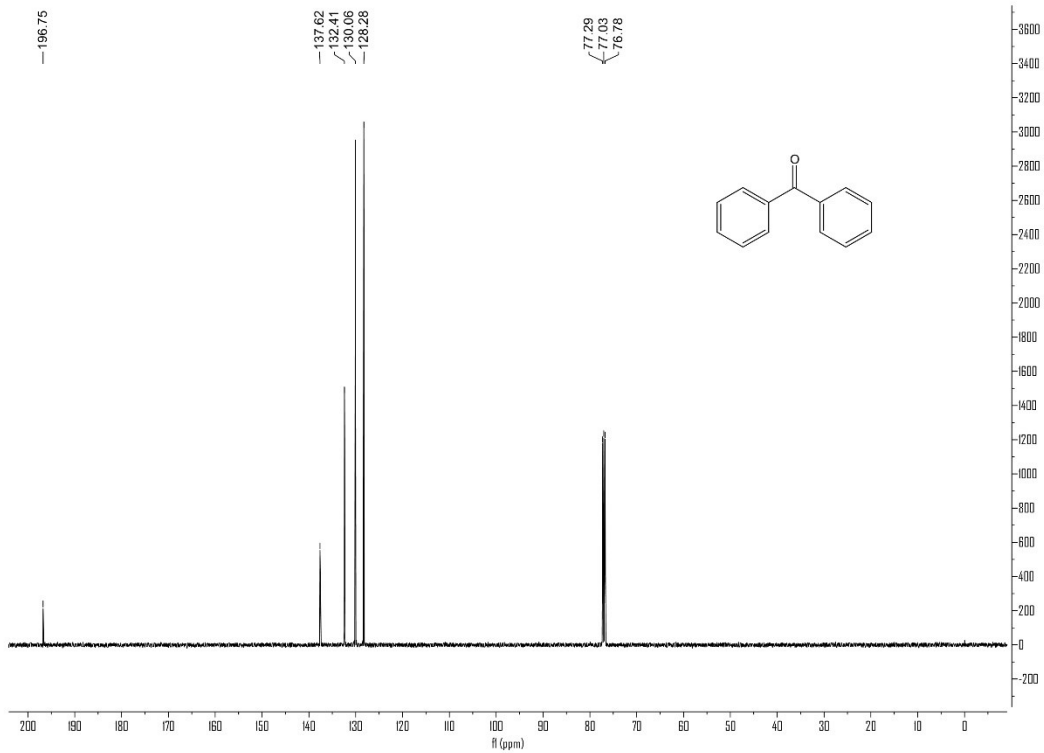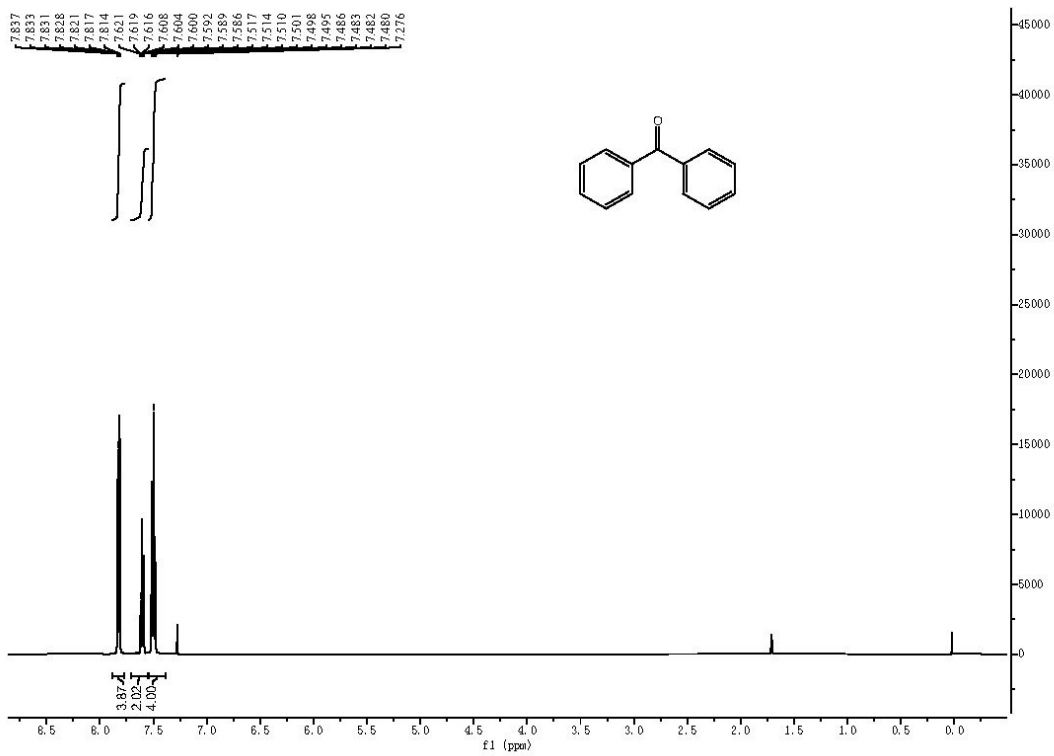

2b:

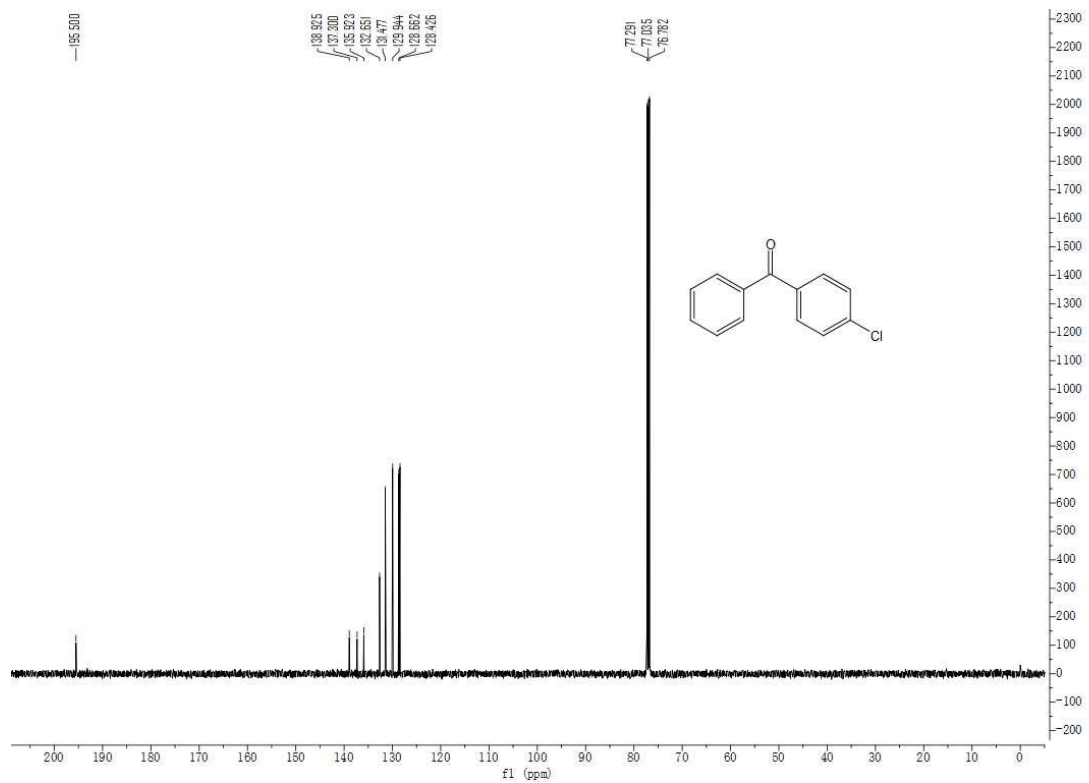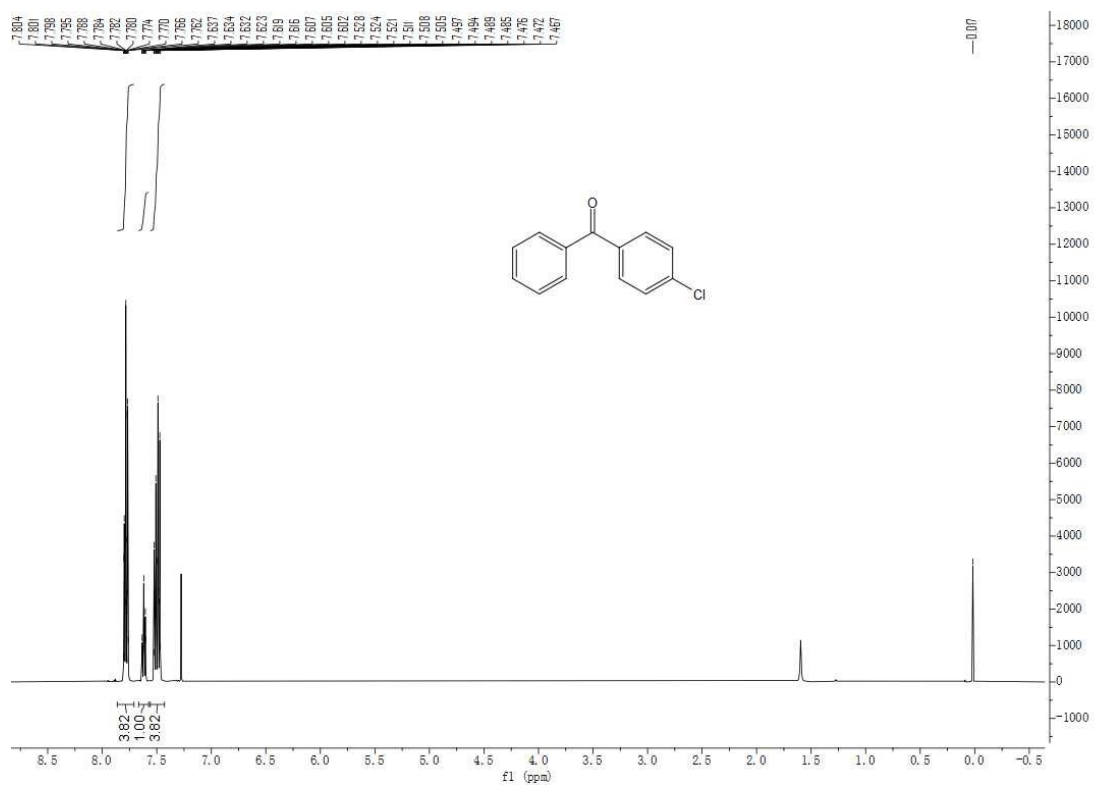

2c:

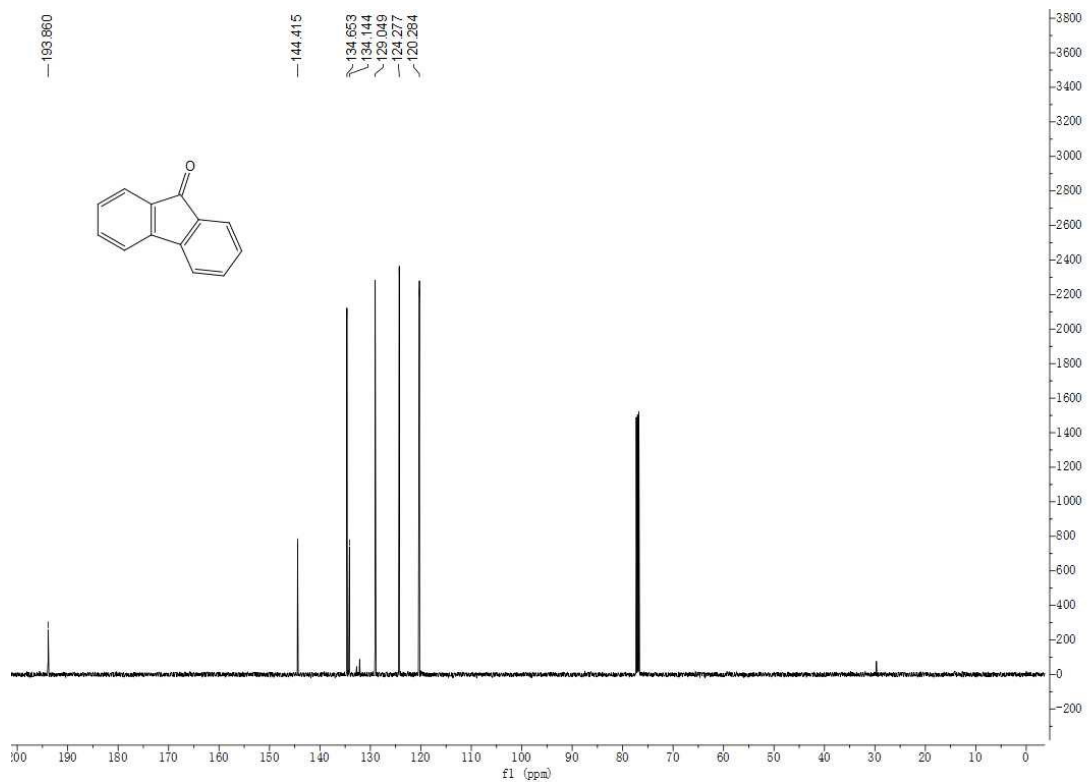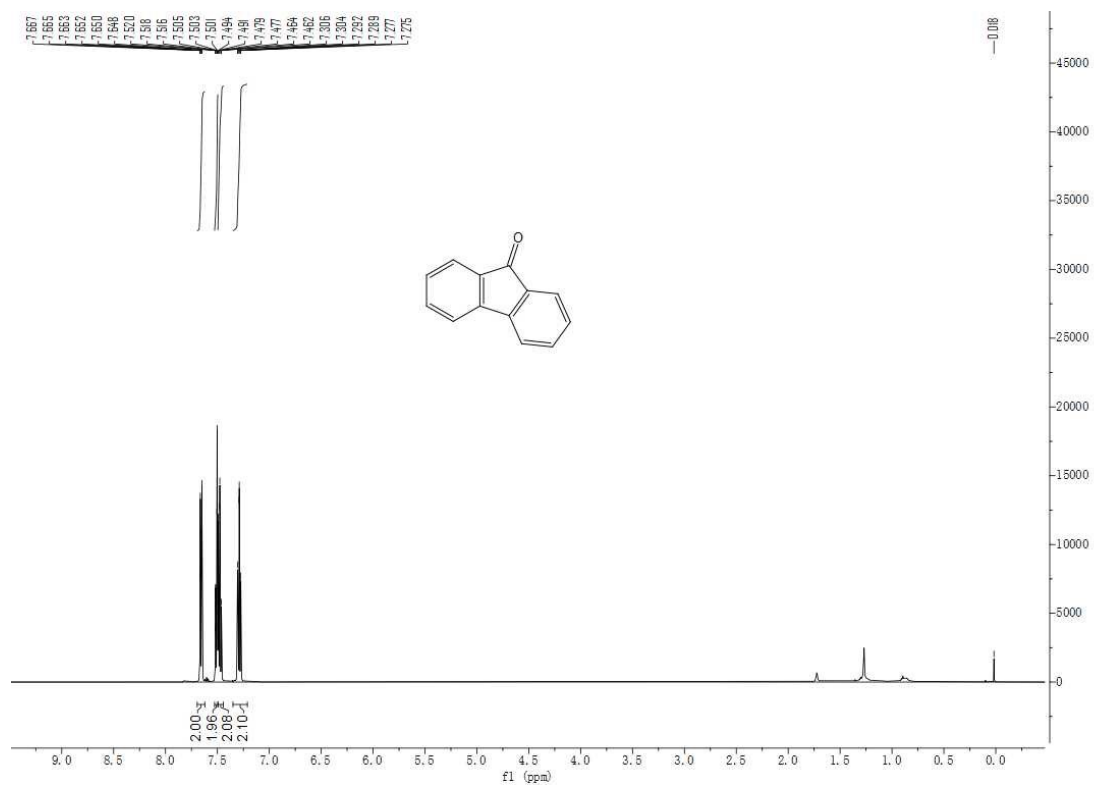

2d:

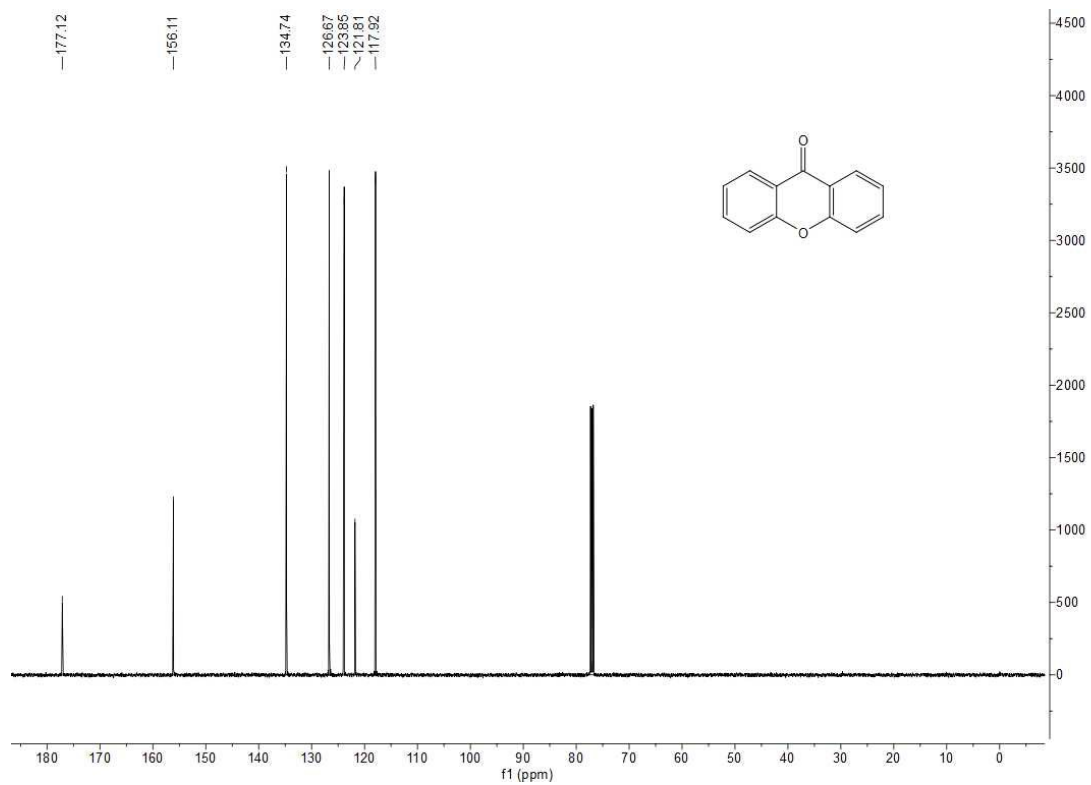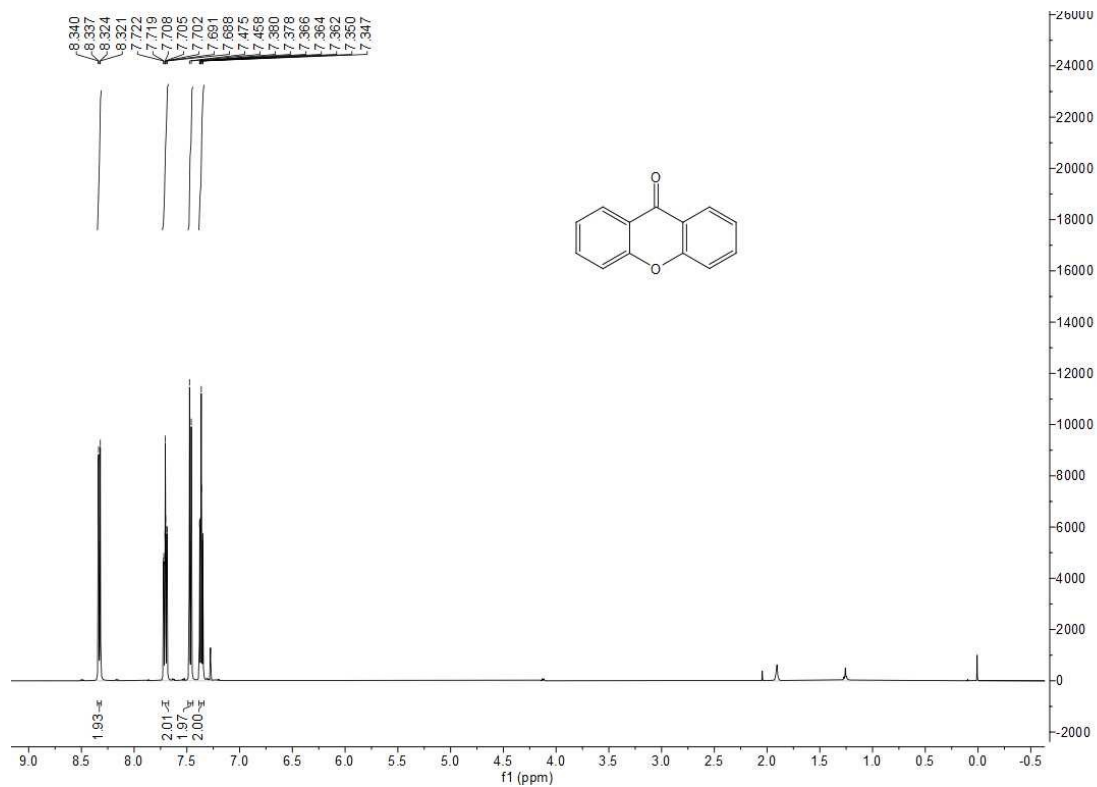

2e:

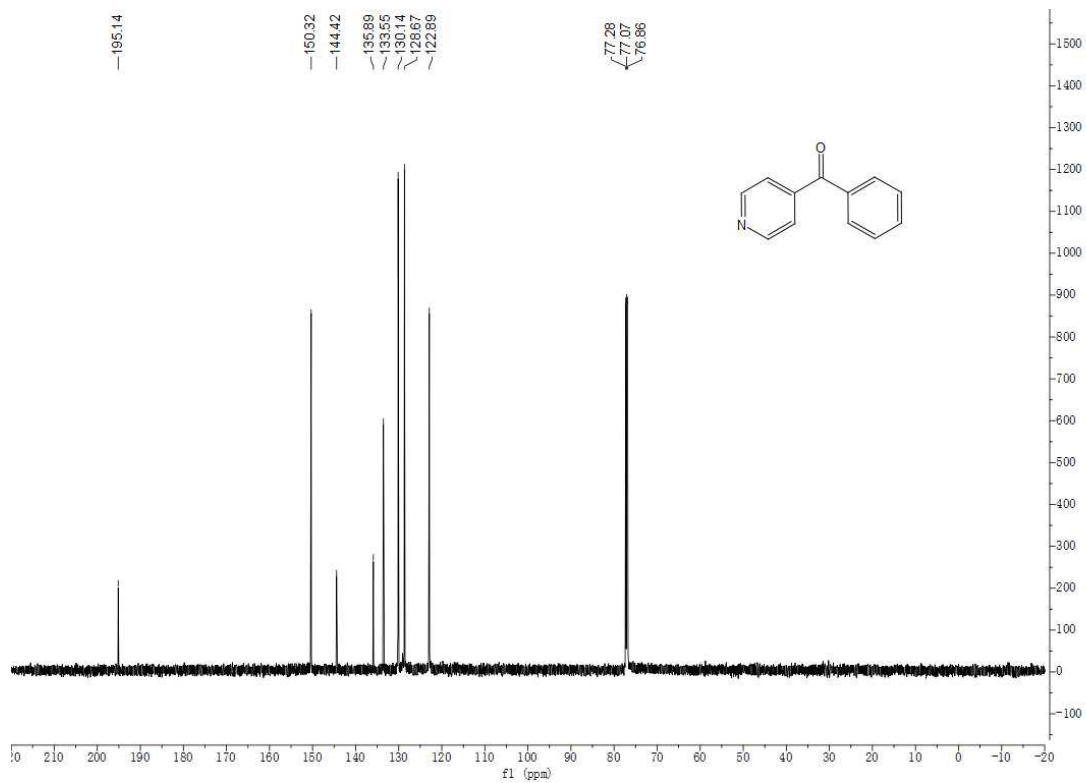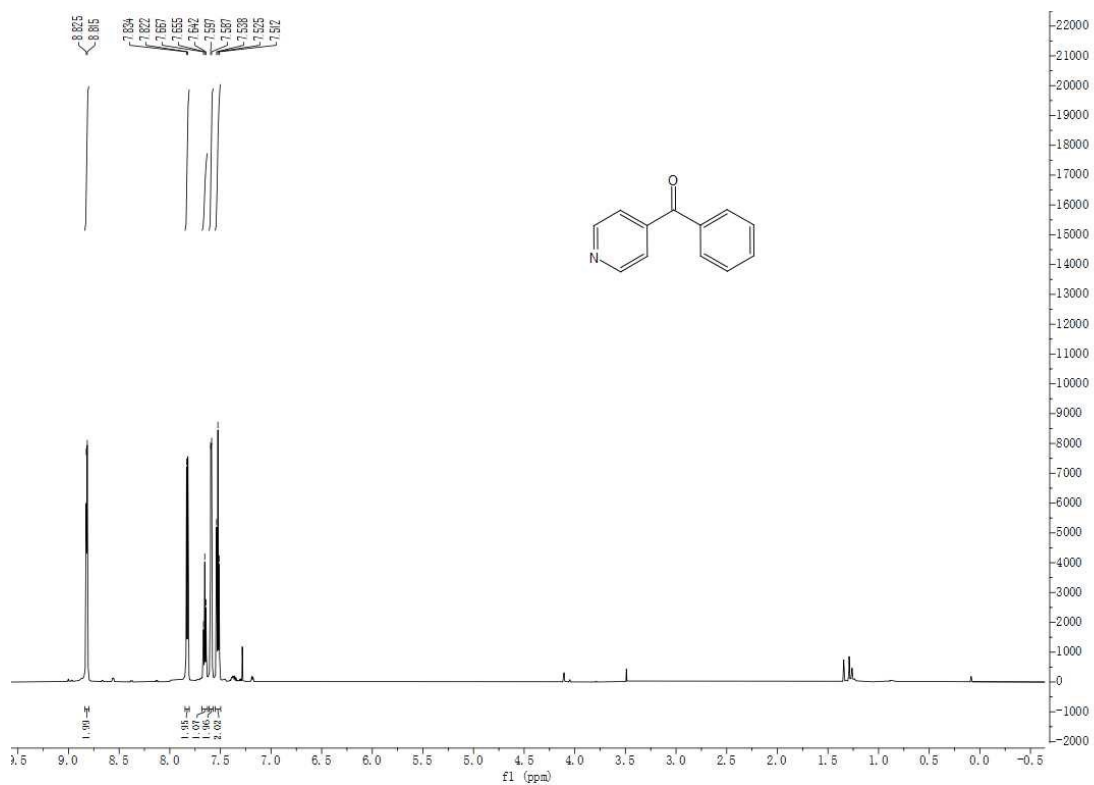

2f:

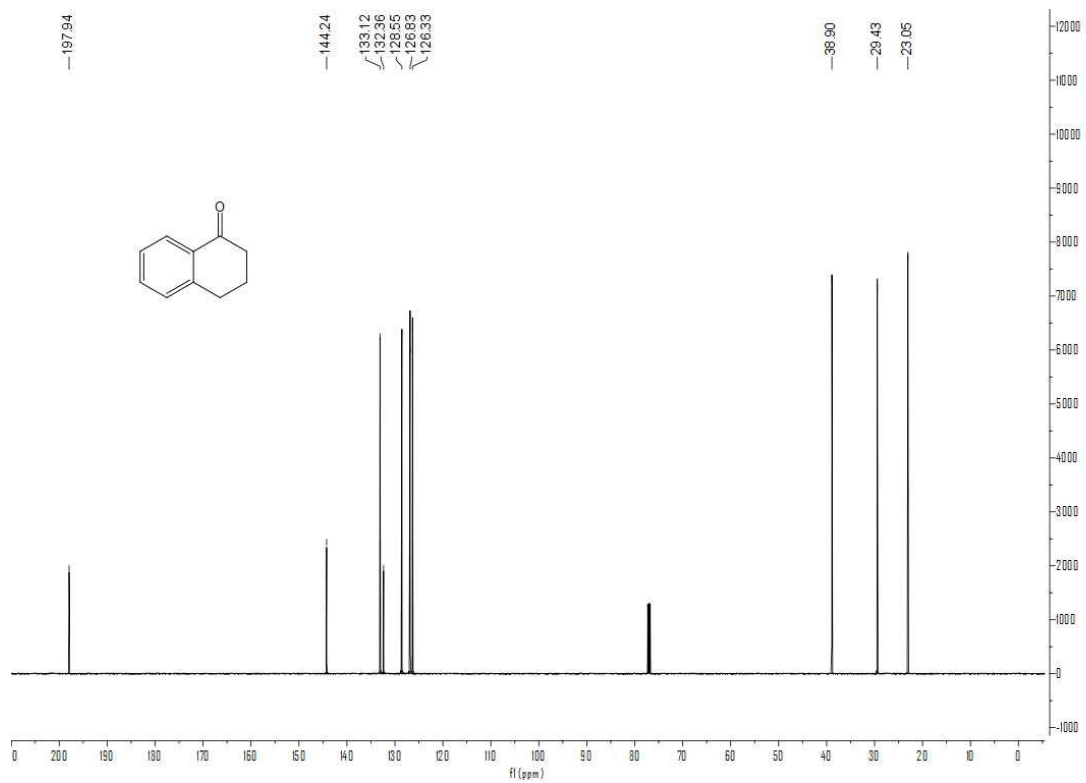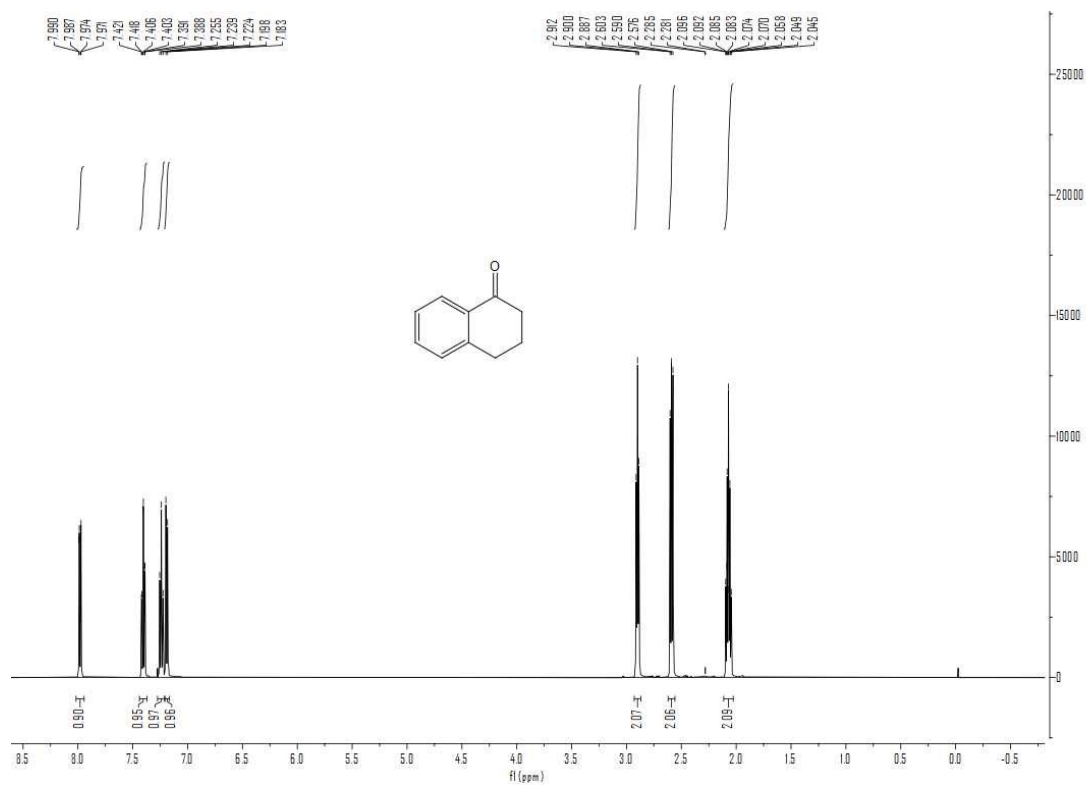

2g:

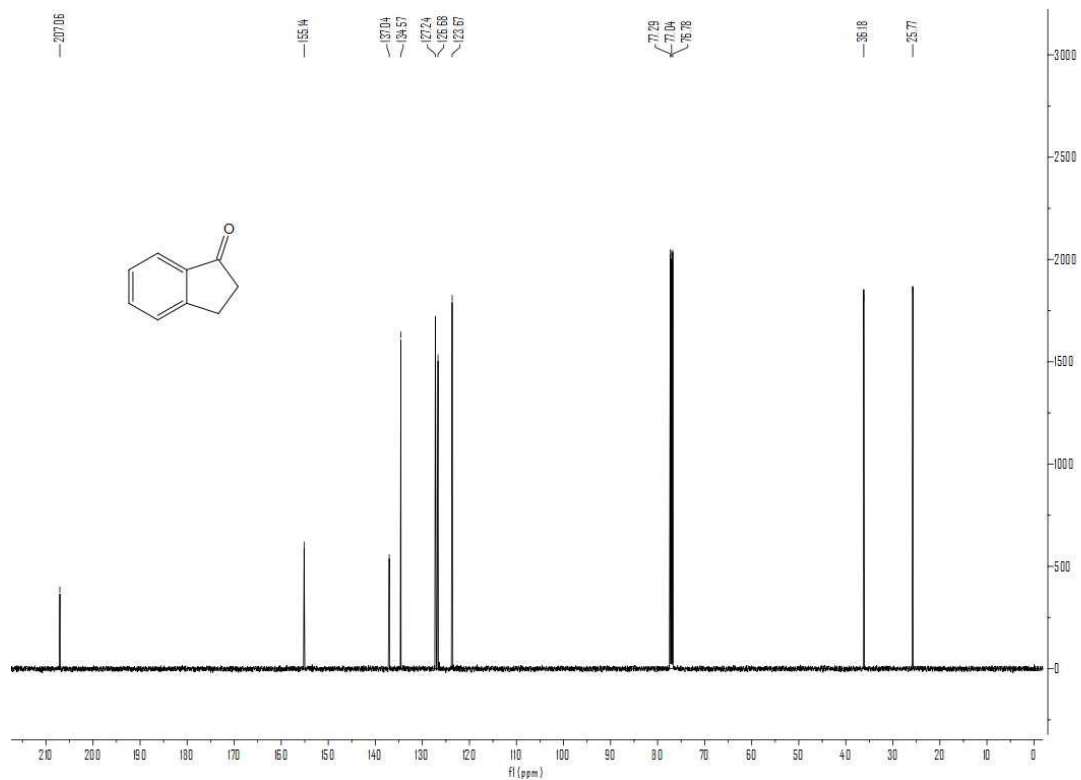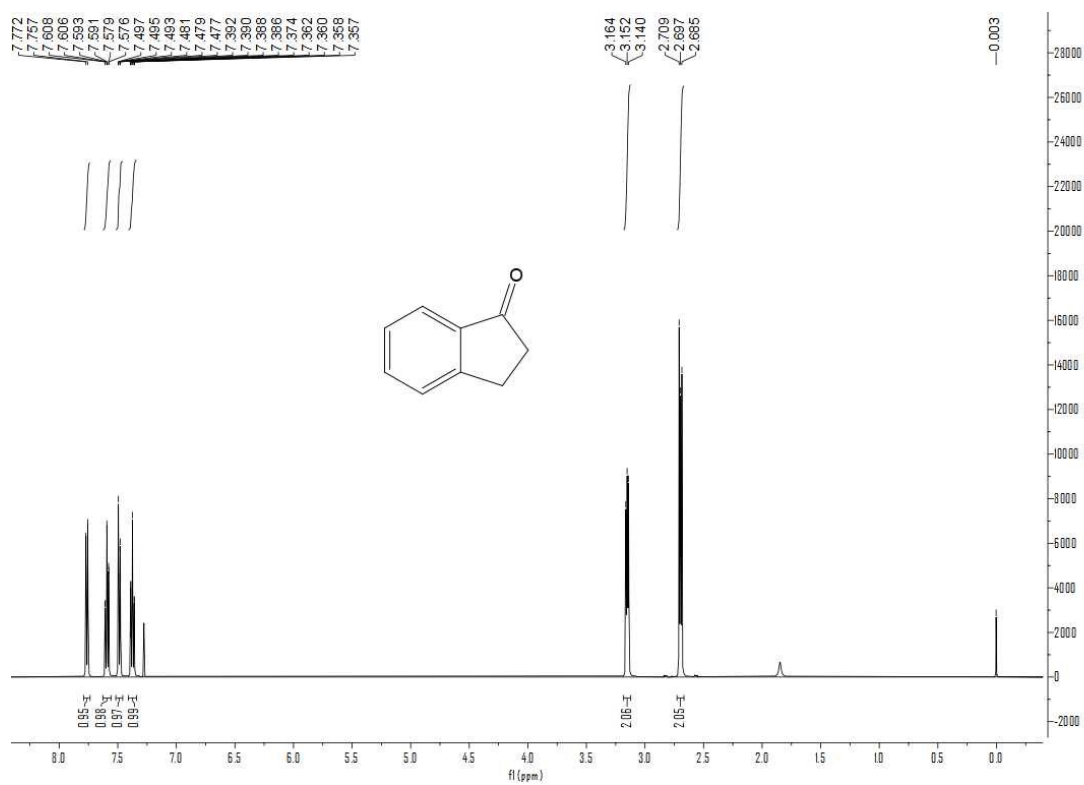

2h:



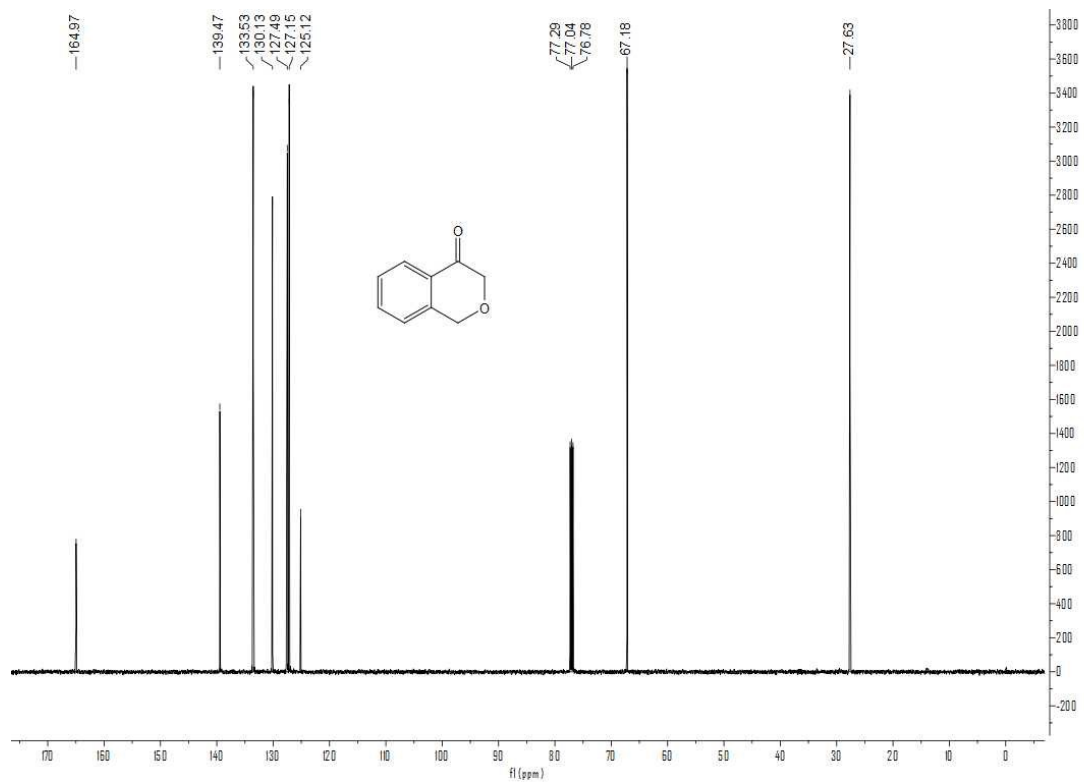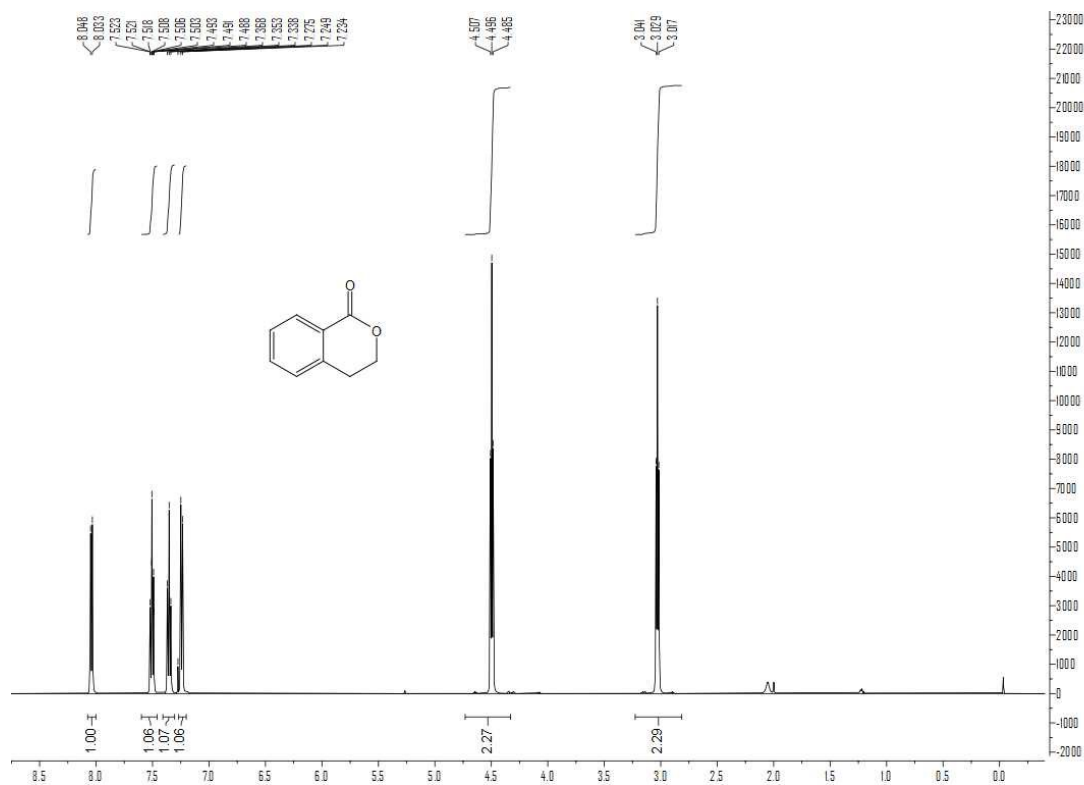

2i:

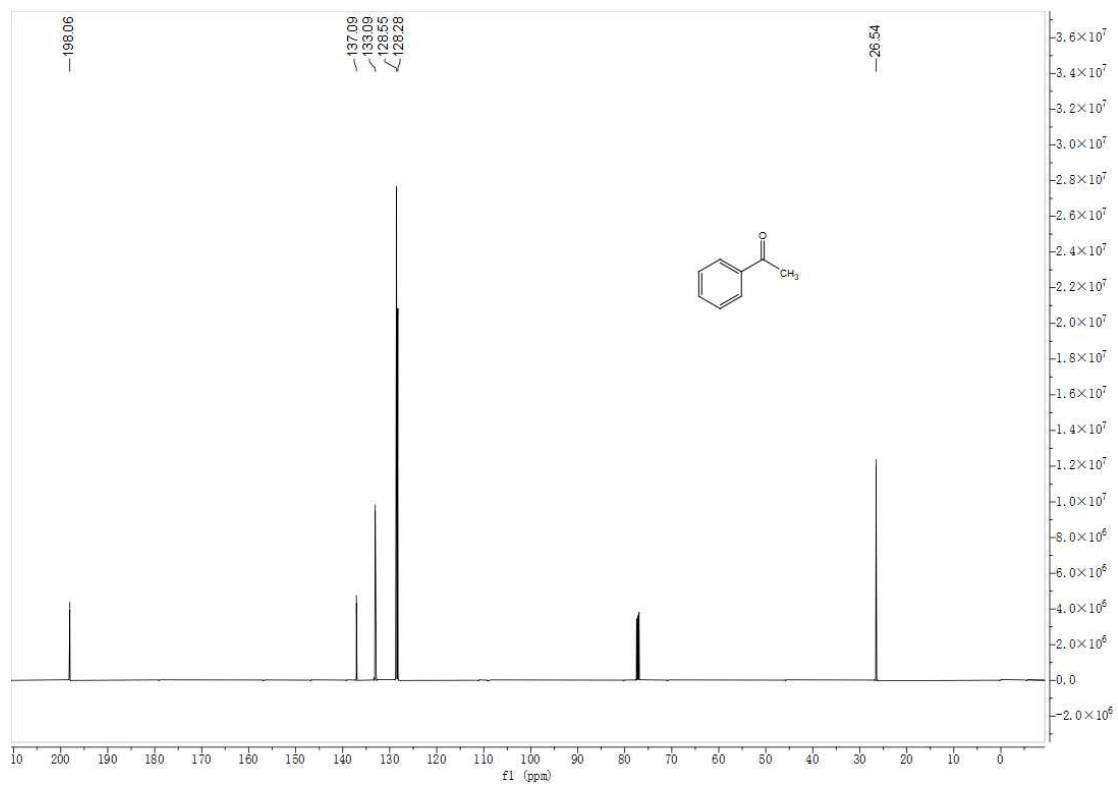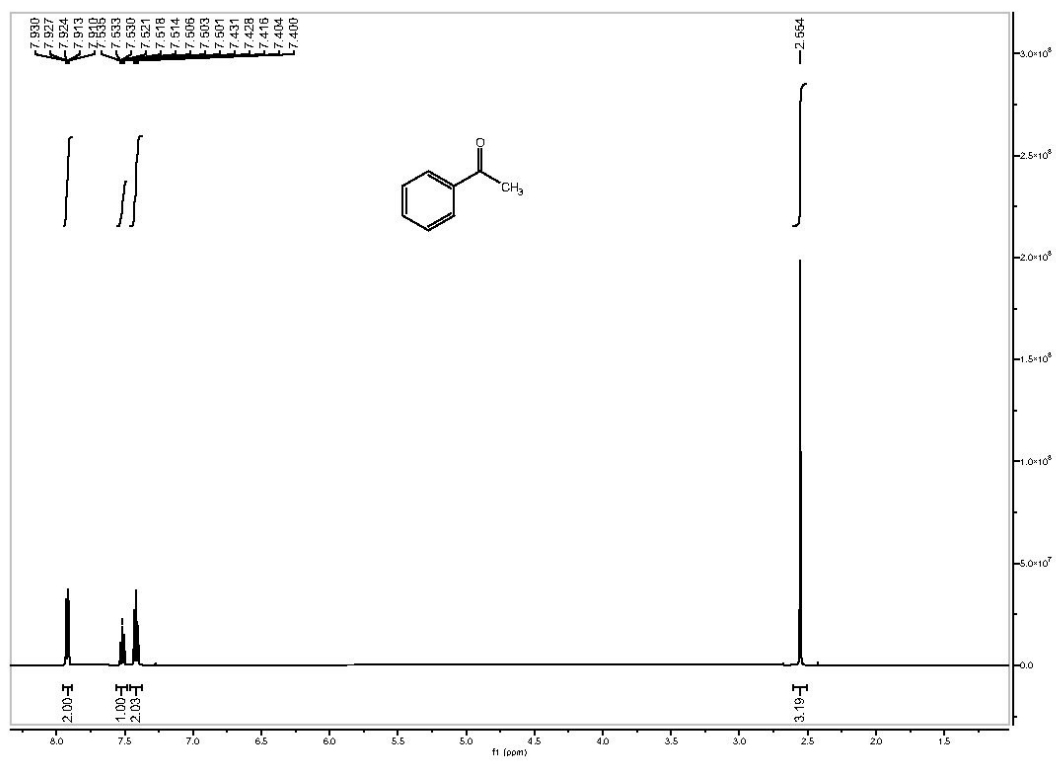

2j:

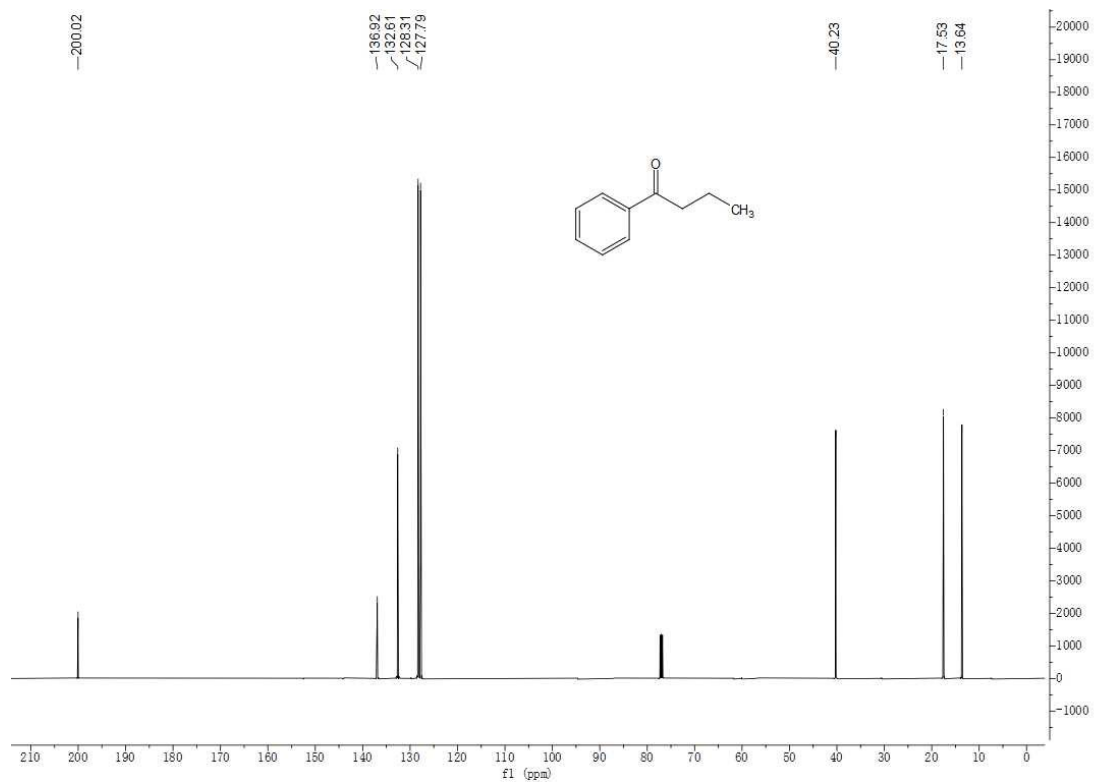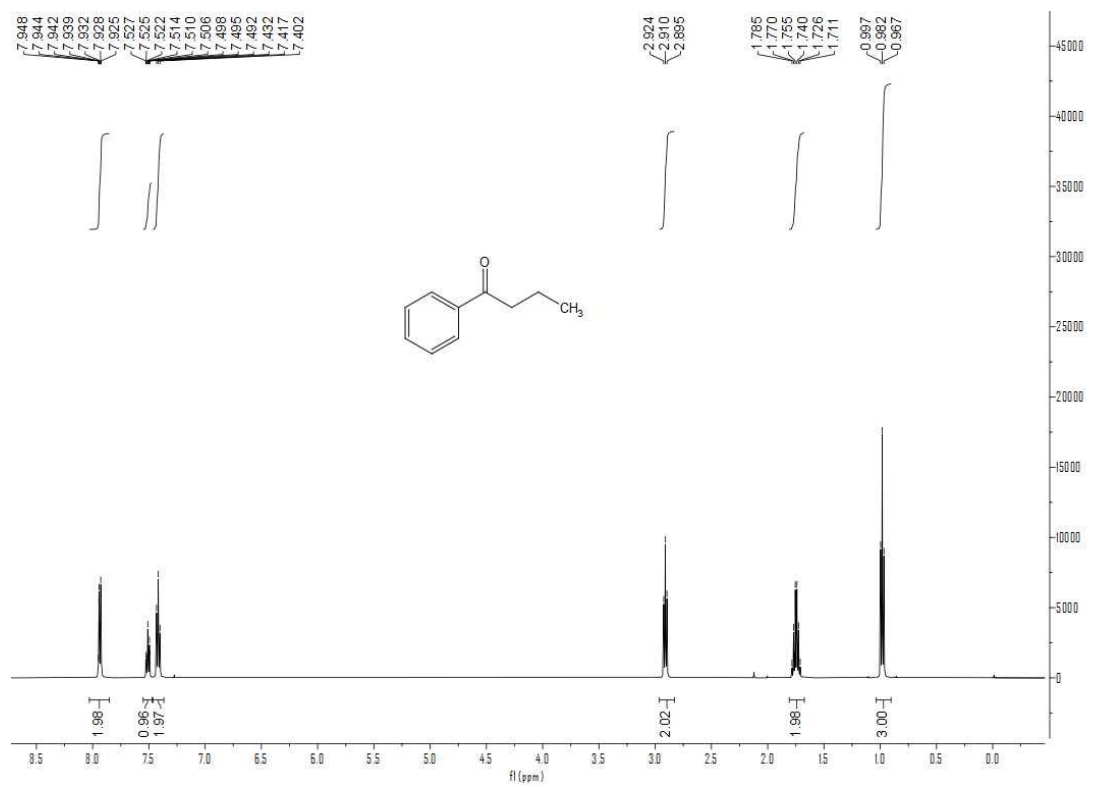

2k:

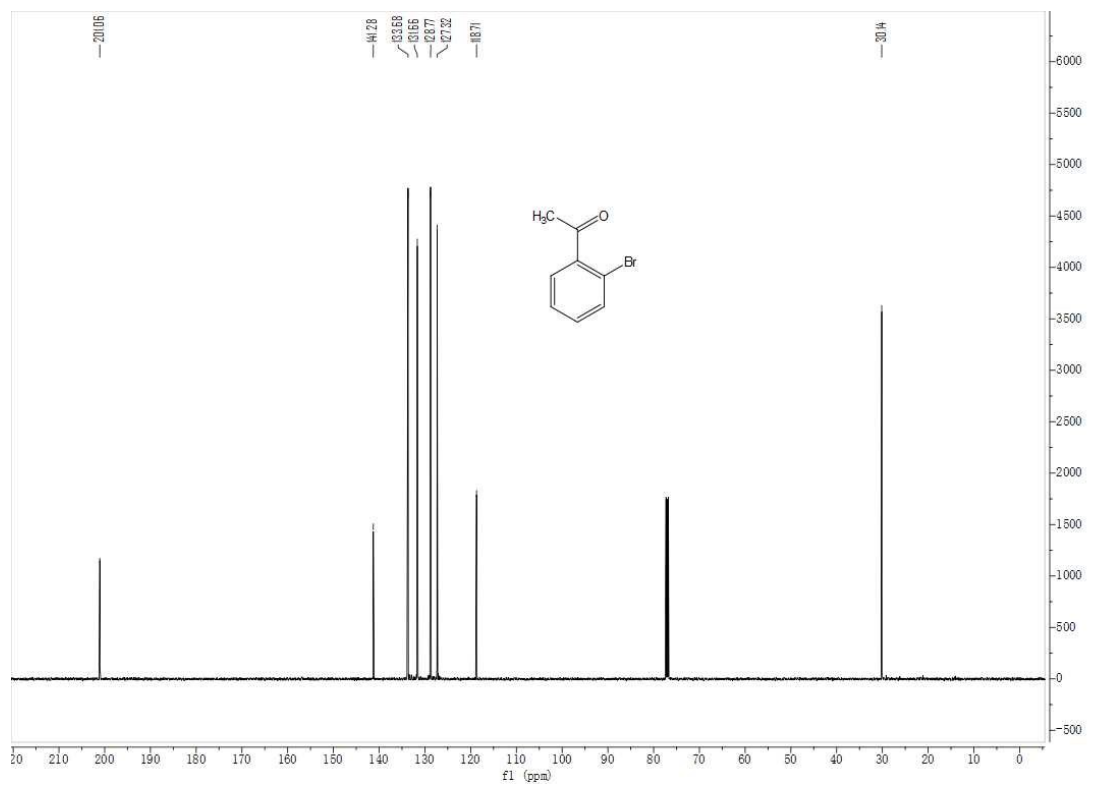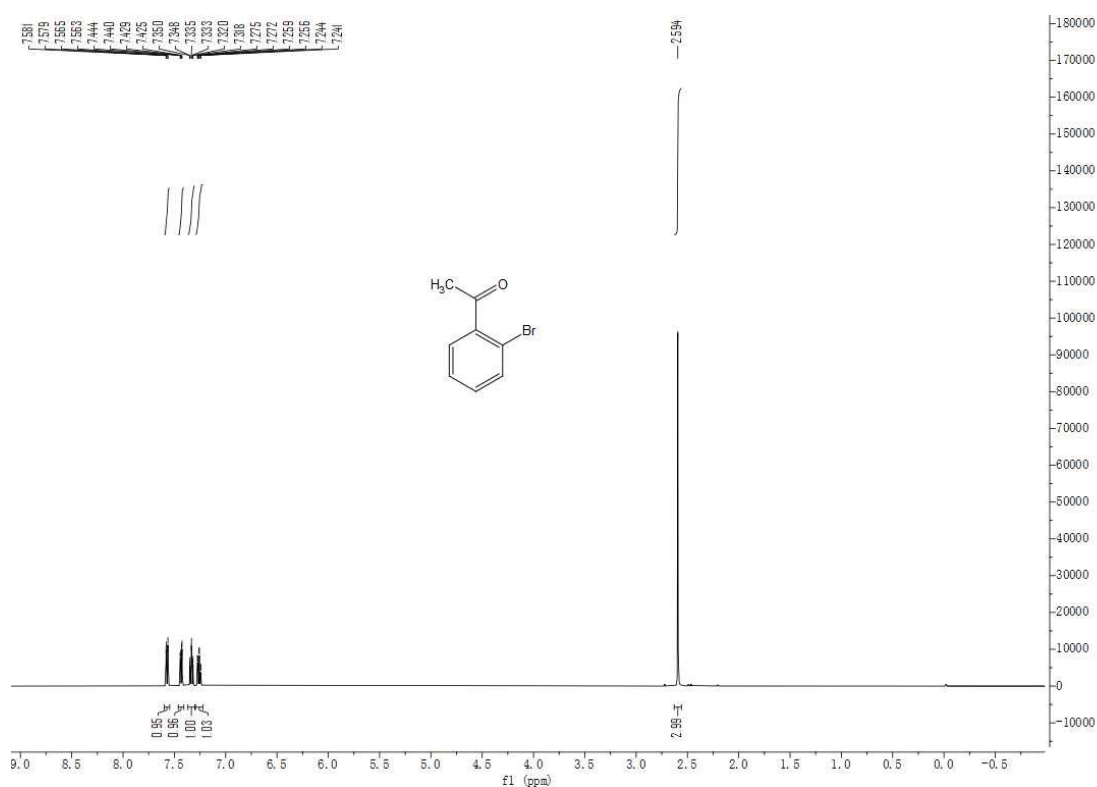

21:

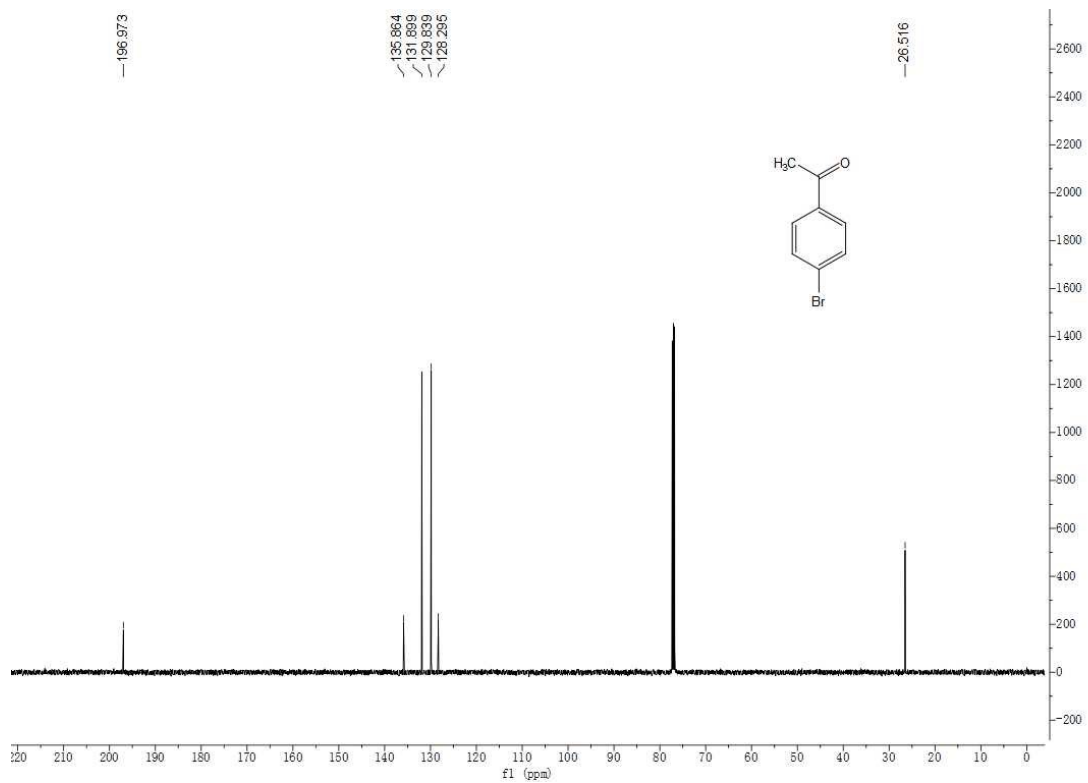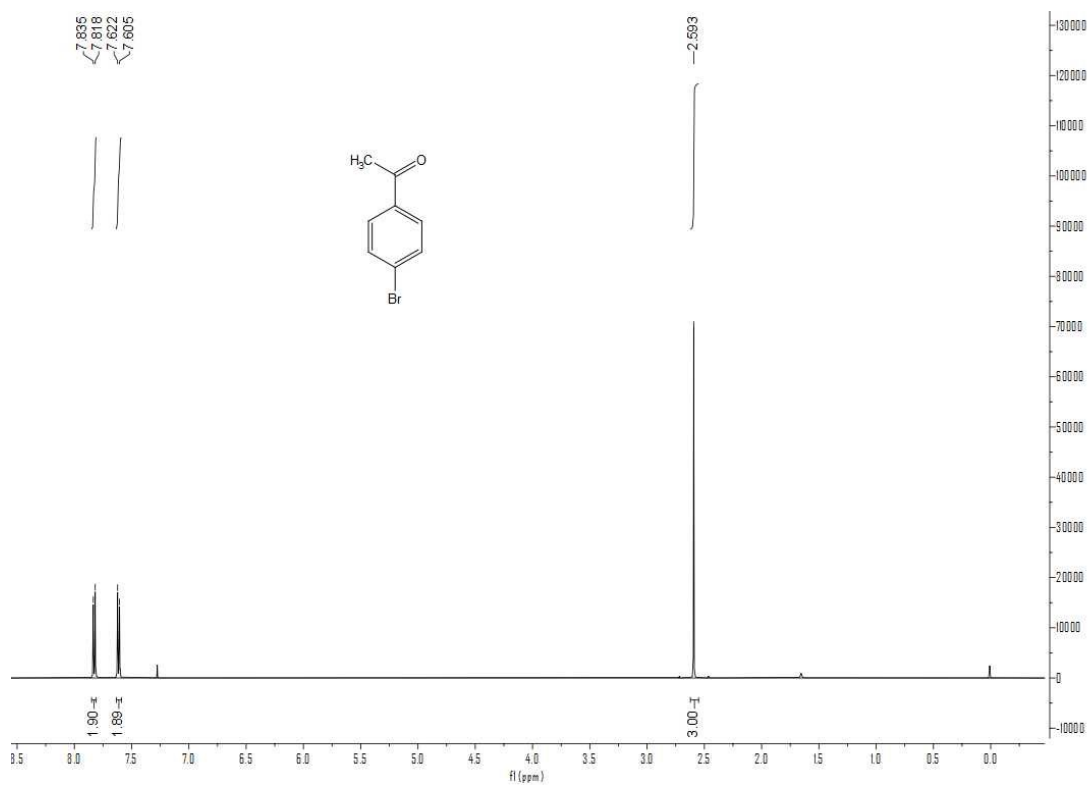

2m:

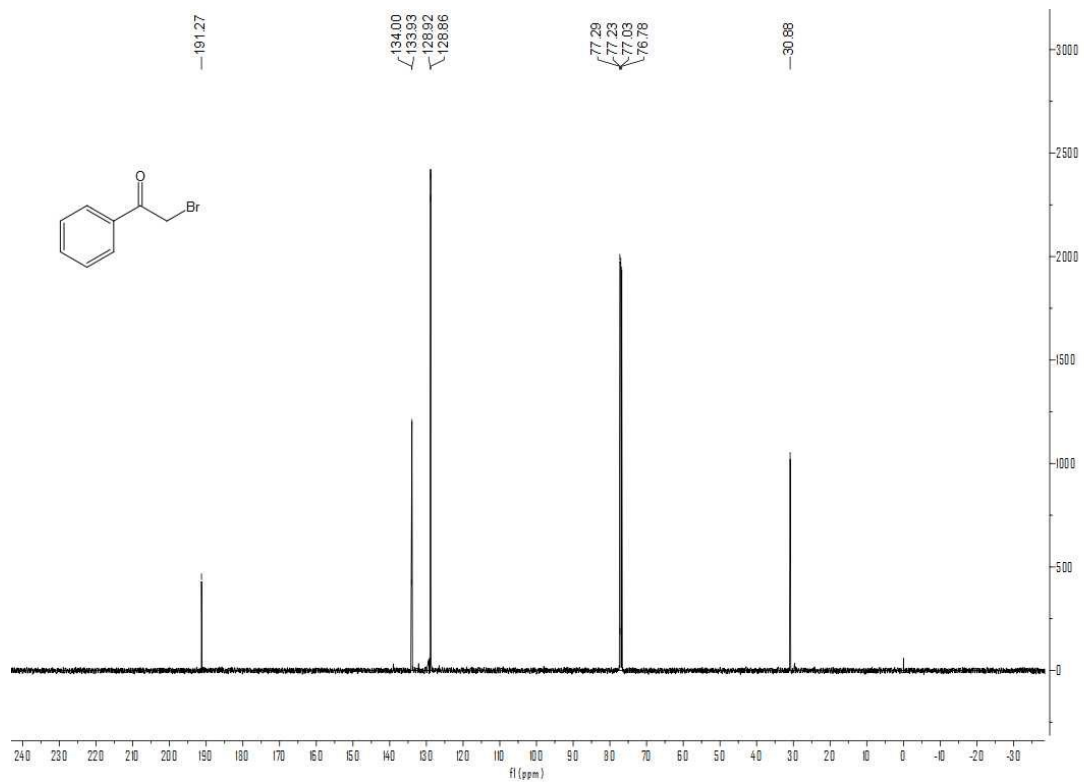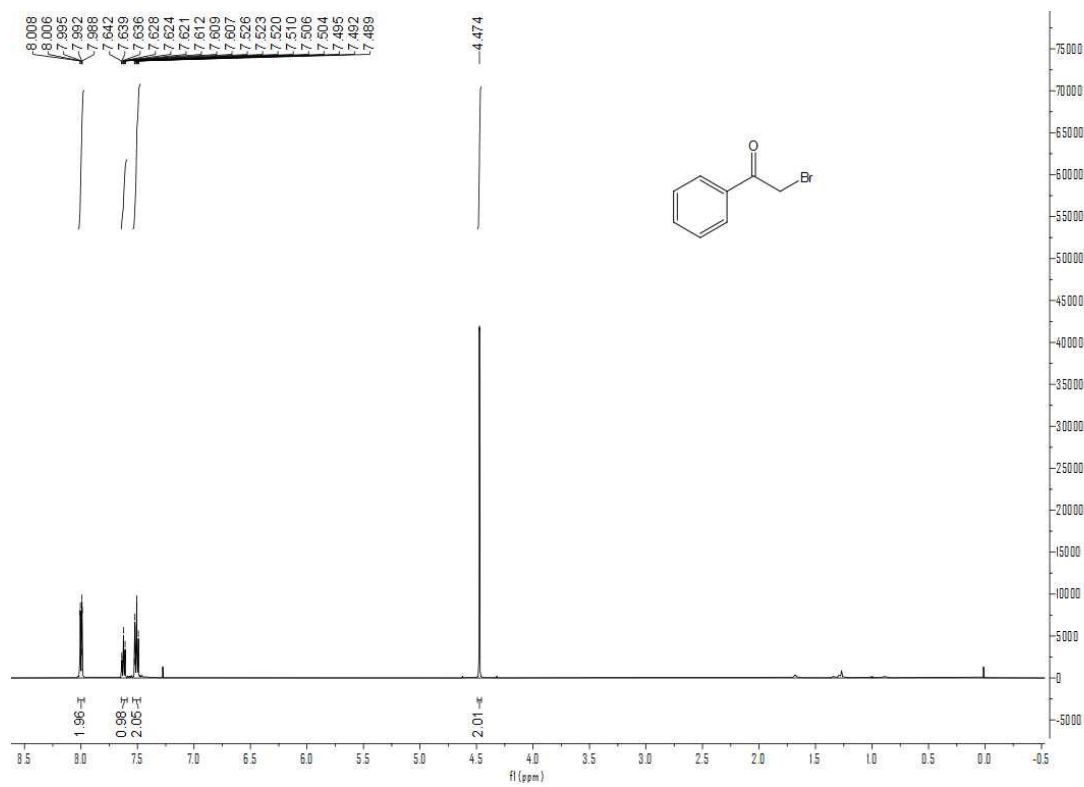

2n:

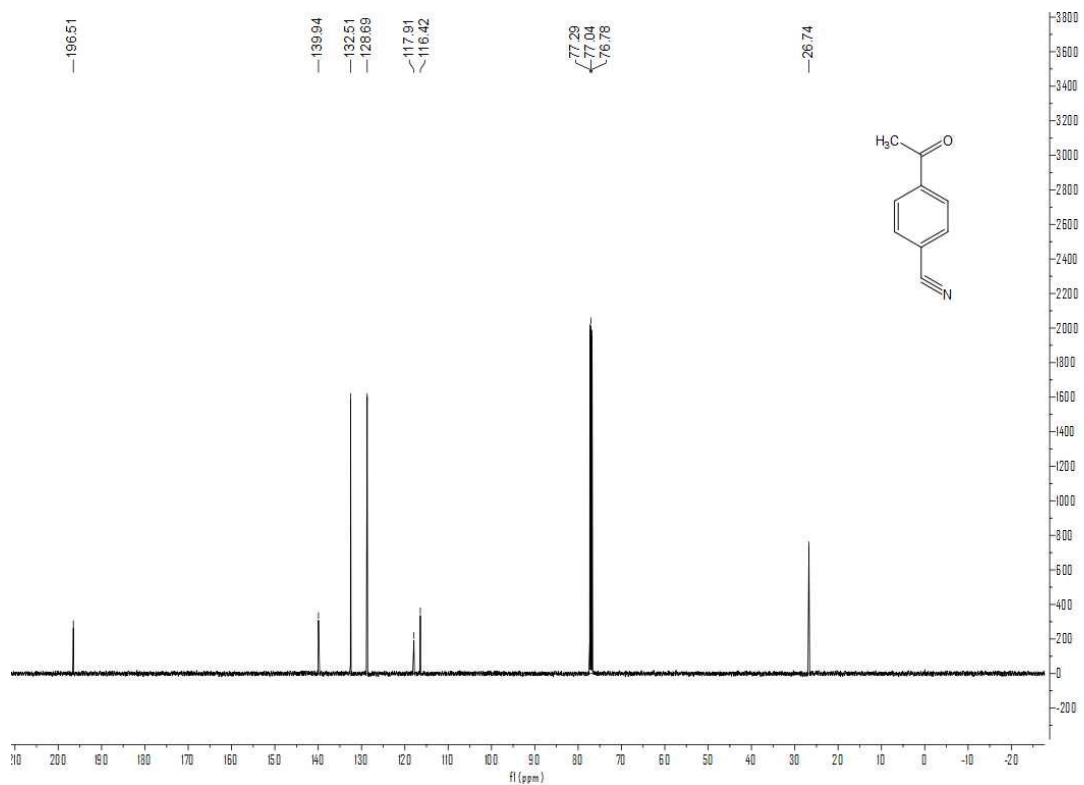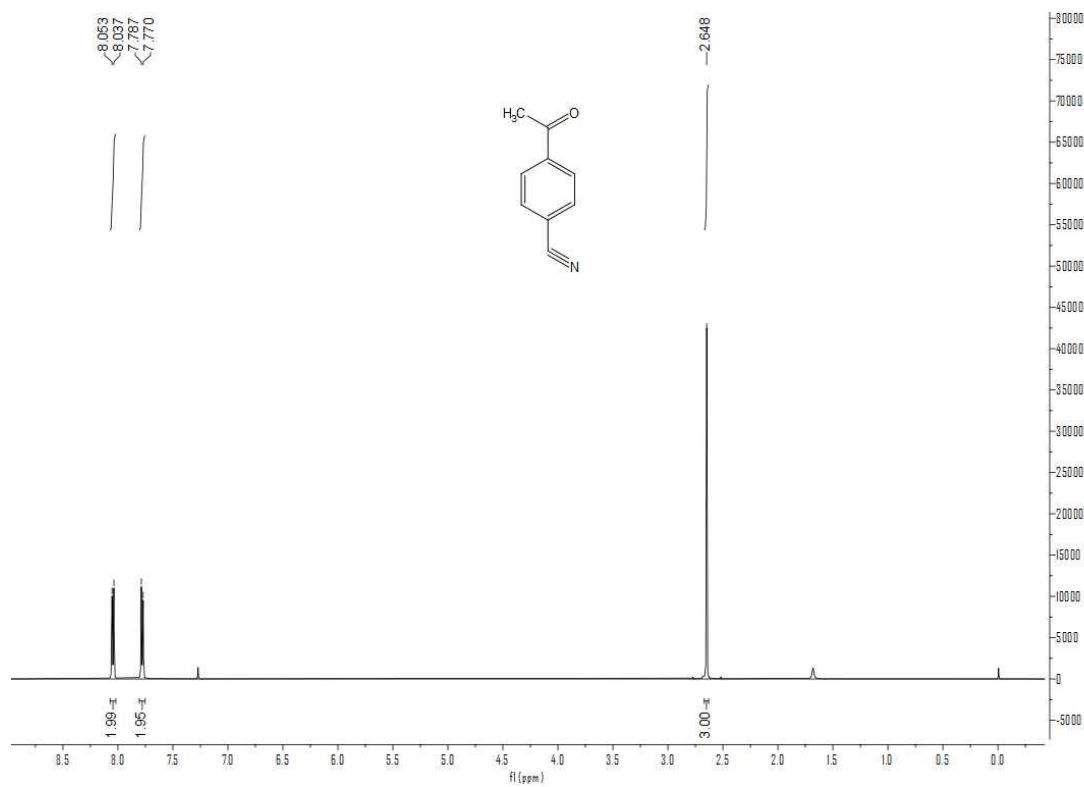

2o:

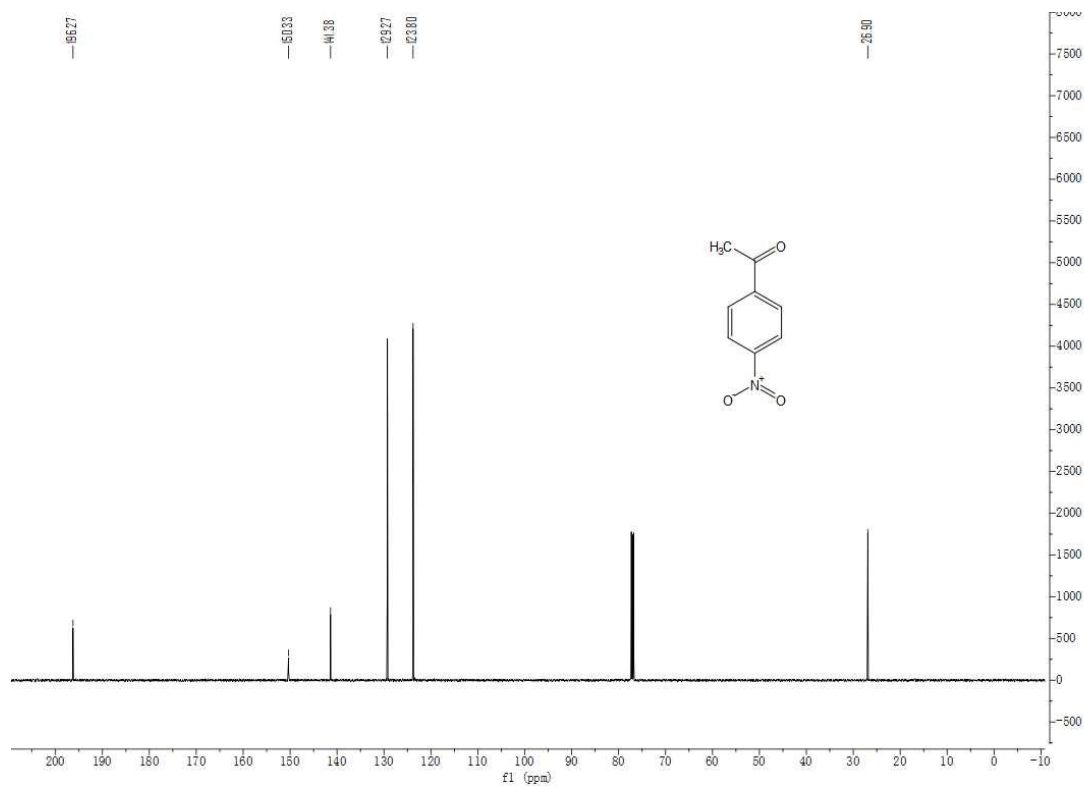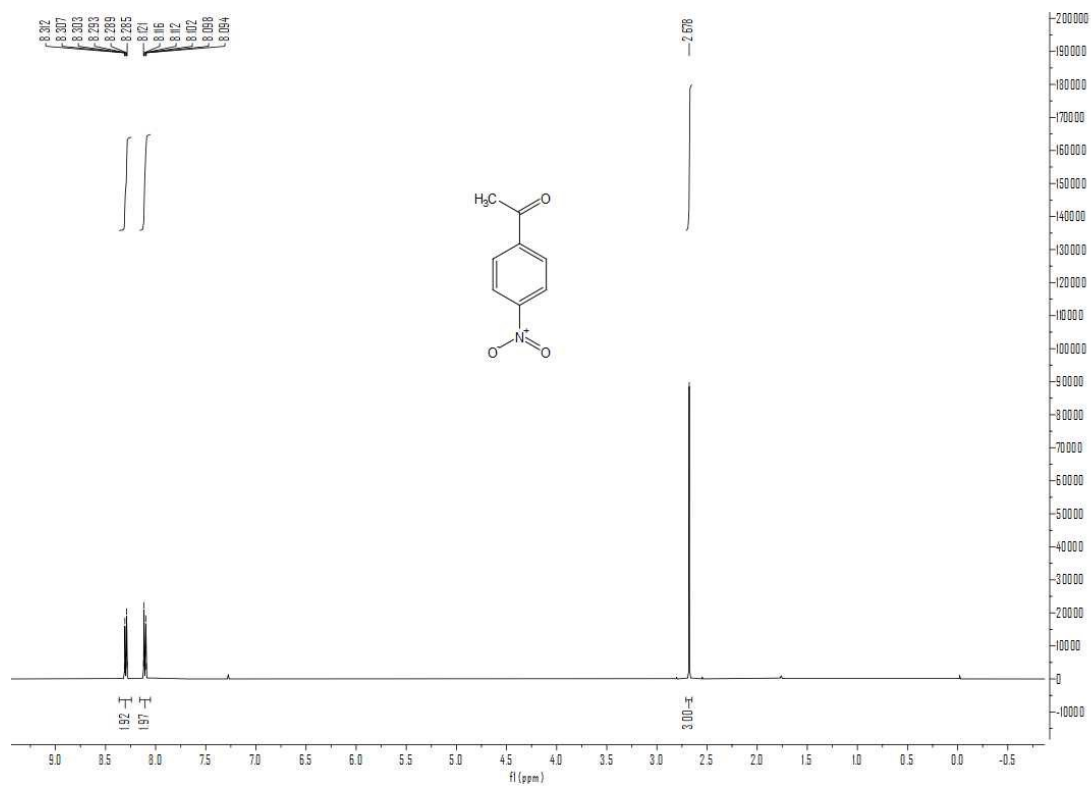



2p:

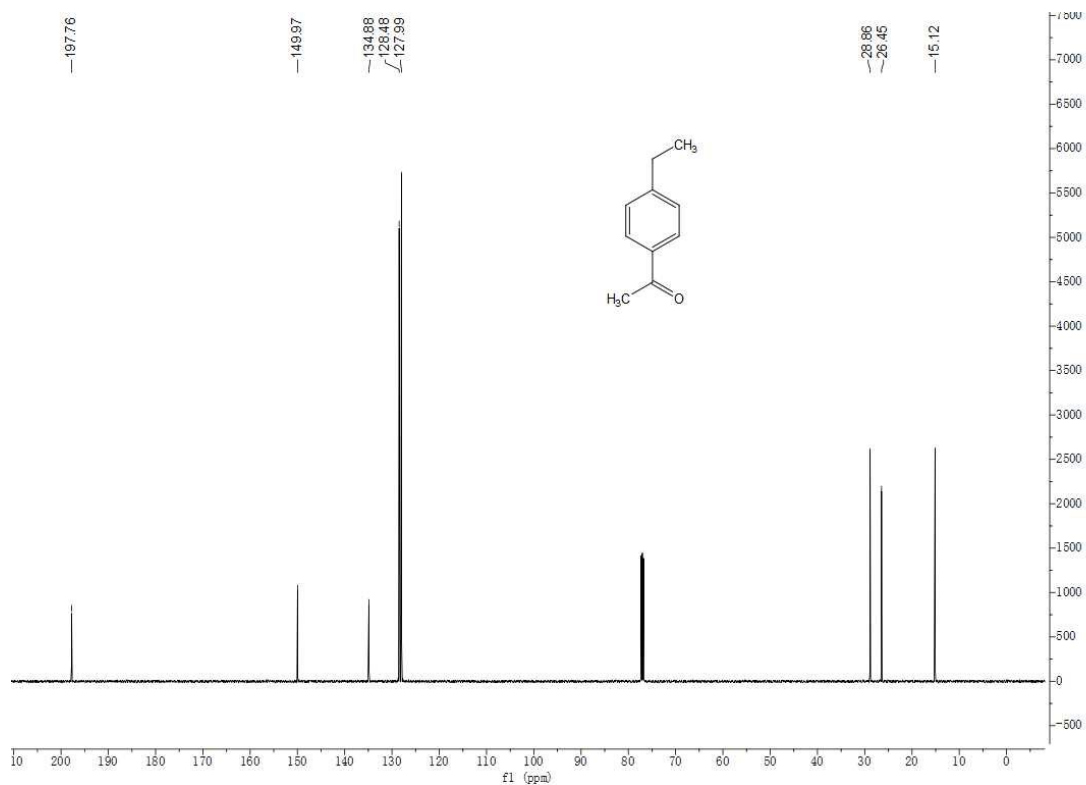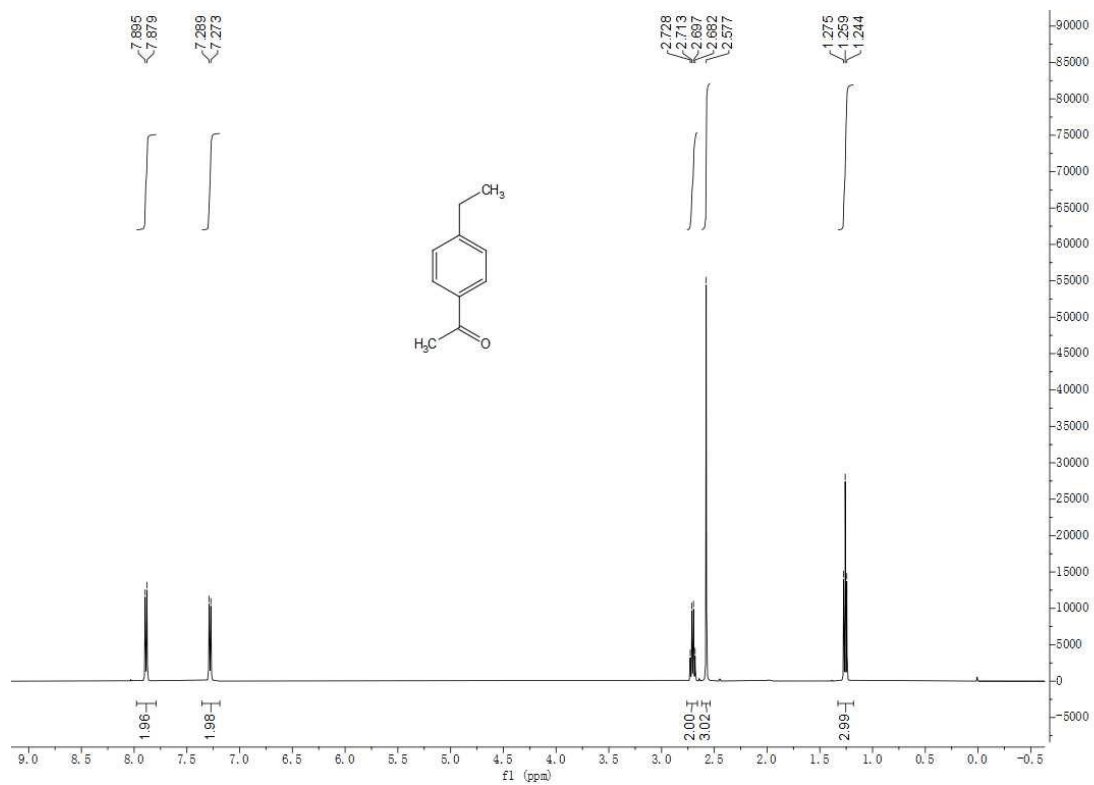

2q:

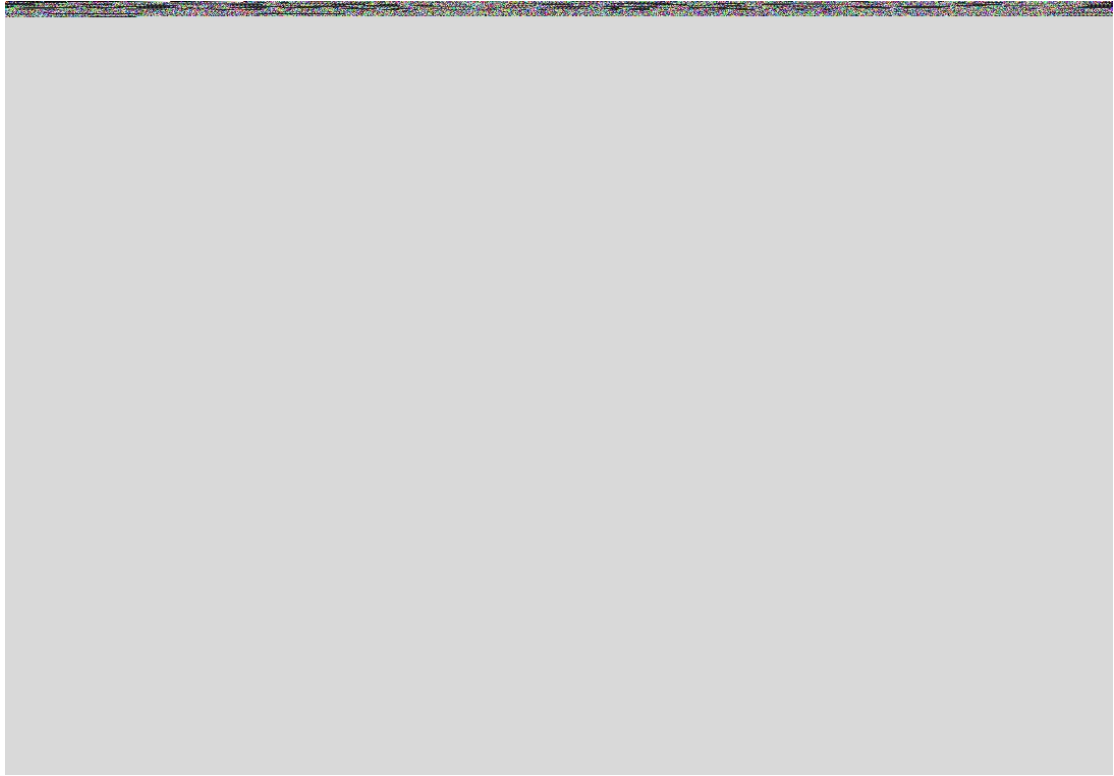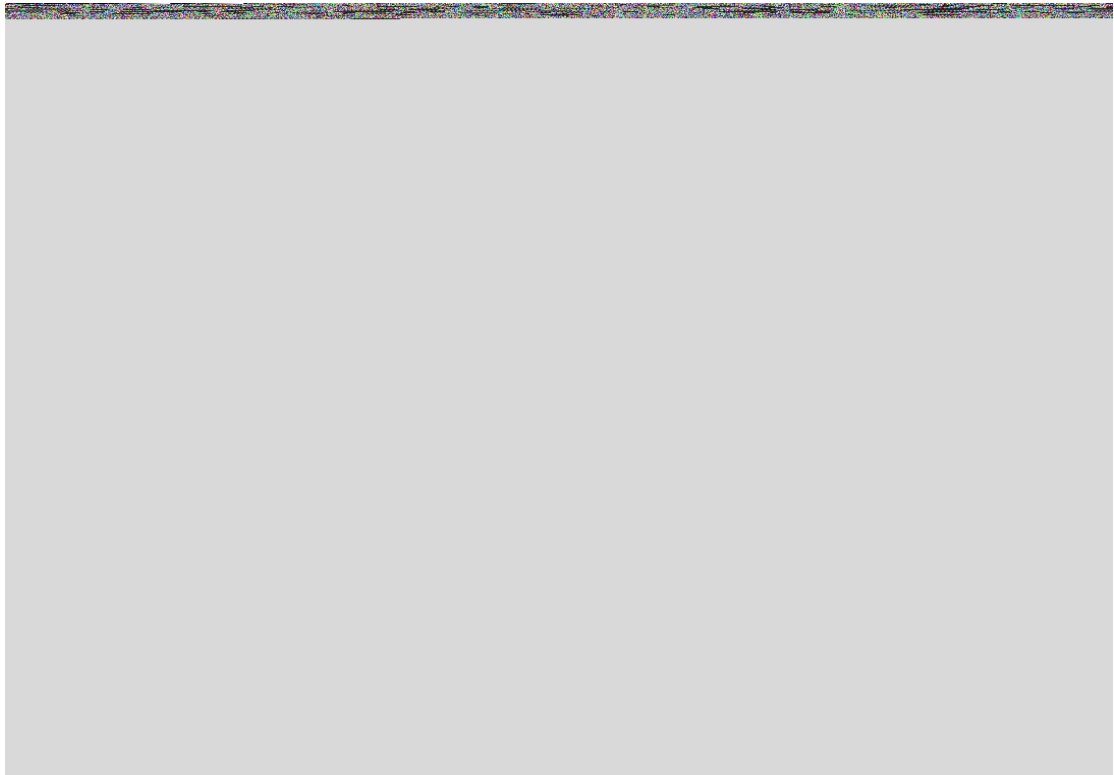

2r:

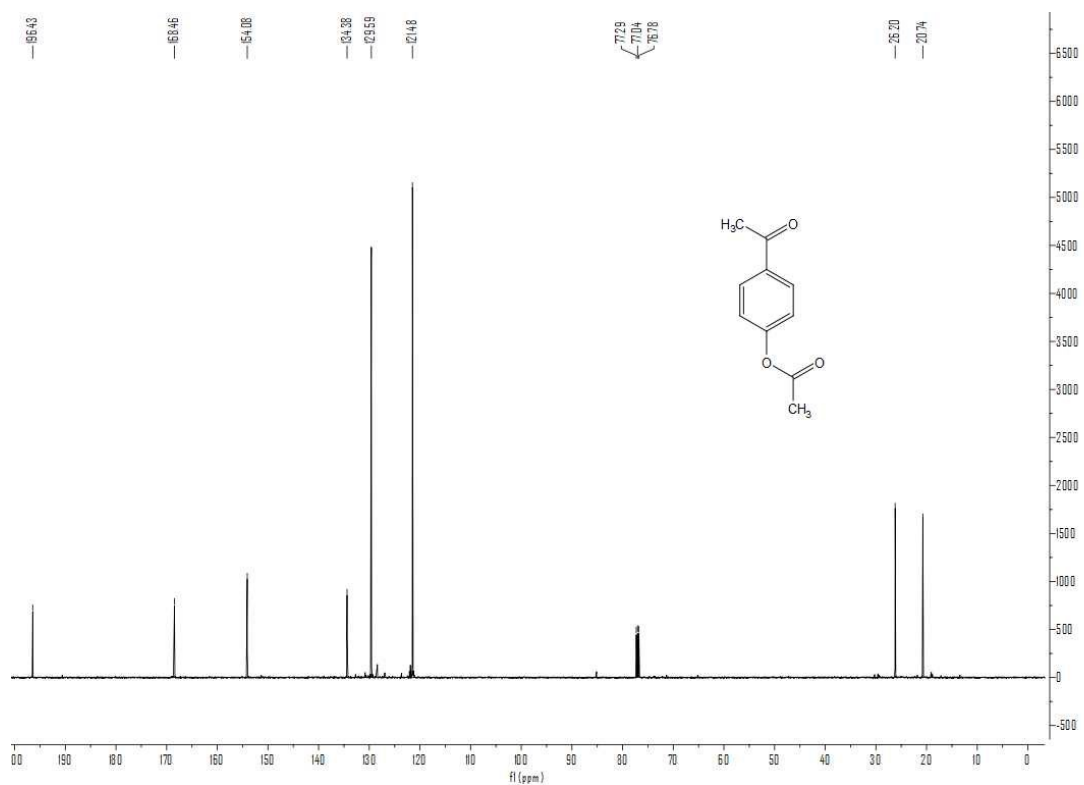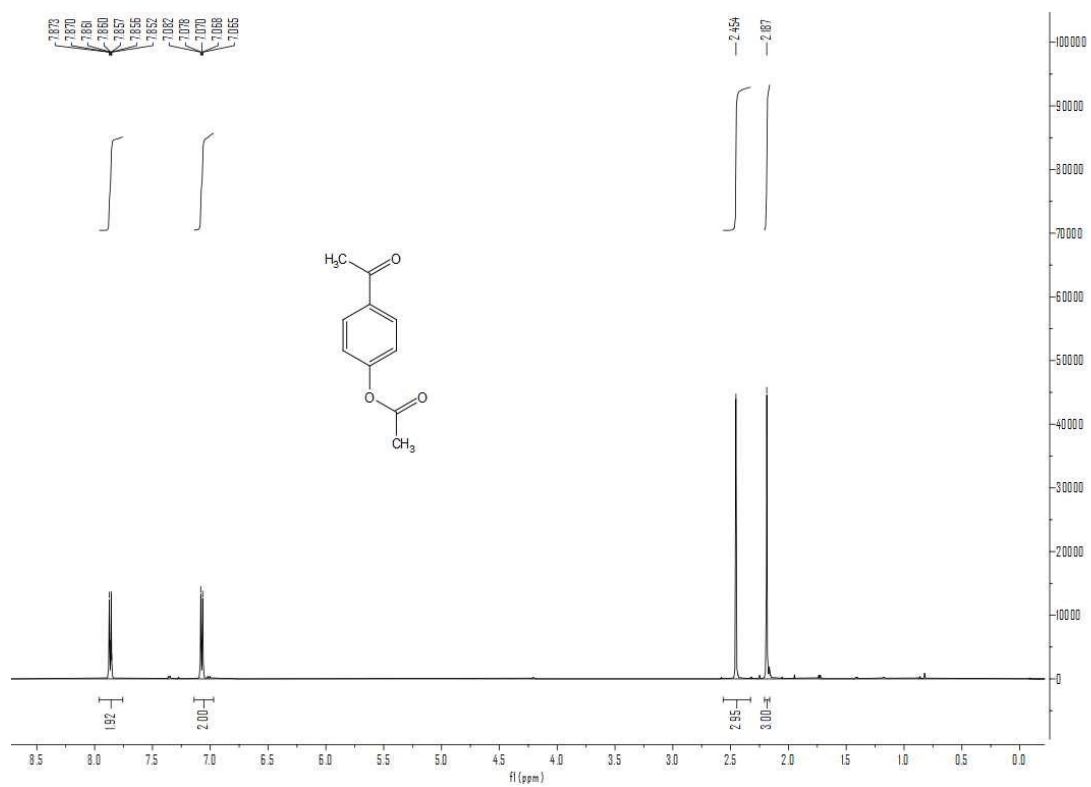

2s:

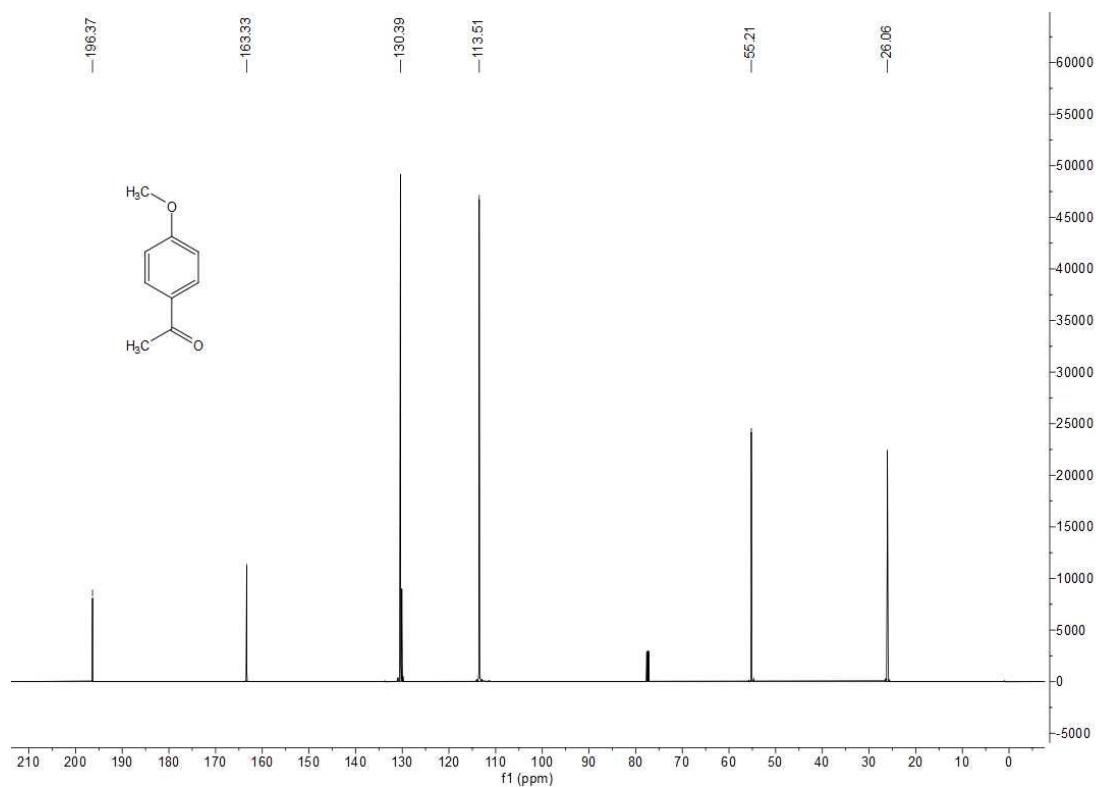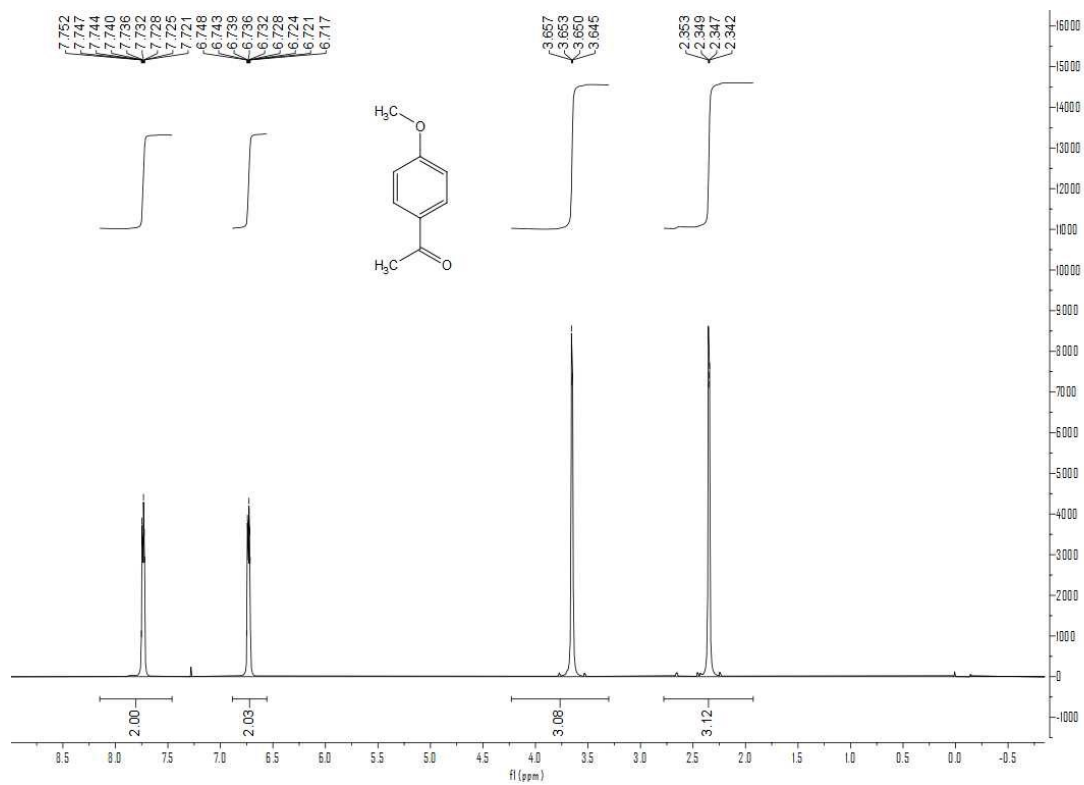

## References

1. L.-Q. Cui, K. Liu and C. Zhang, Effective oxidation of benzylic and alkane C–H bonds catalyzed by sodium o-iodobenzenesulfonate with Oxone as a terminal oxidant under phase-transfer conditions, *Organic & Biomolecular Chemistry*, 2011, **9**, 2258.
2. K. O. Jeon, J. H. Jun, J. S. Yu and C. K. Lee, Infrared and nuclear magnetic resonance properties of benzoyl derivatives of five-membered monoheterocycles and determination of aromaticity indices, *J. Heterocycl. Chem.*, 2003, **40**, 763.
3. M. Spektor, Xanthone, *Khim.-Farm. Prom-st.*, 1933, 195.
4. J. Zhao and R. C. Larock, One-Pot Synthesis of Xanthenes and Thioxanthenes by the Tandem Coupling–Cyclization of Arynes and Salicylates, *Organic Letters*, 2005, **7**, 4273.
5. T. Dohi, N. Takenaga, A. Goto, H. Fujioka and Y. Kita, Clean and Efficient Benzylic C-H Oxidation in Water Using a Hypervalent Iodine Reagent: Activation of Polymeric Iodosobenzene with KBr in the Presence of Montmorillonite-K10, *J. Org. Chem.*, 2008, **73**, 7365.
6. A. Shaabani, P. Mirzaei, S. Naderi and D. G. Lee, Green oxidations. The use of potassium permanganate supported on manganese dioxide, *Tetrahedron*, 2004, **60**, 11415.
7. N. Schroeder, J. Wencel-Delord and F. Glorius, High-Yielding, Versatile, and Practical [Rh(III)Cp\*]-Catalyzed Ortho Bromination and Iodination of Arenes, *J. Am. Chem. Soc.*, 2012, **134**, 8298.
8. V. Nair, S. B. Panicker, A. Augustine, T. G. George, S. Thomas and M. Vairamani, An efficient bromination of alkenes using cerium(IV) ammonium nitrate (CAN) and potassium bromide, *Tetrahedron*, 2001, **57**, 7417.
9. J. A. Murphy, A. G. J. Commeureuc, T. N. Snaddon, T. M. McGuire, T. A. Khan, K. Hisler, M. L. Dewis and R. Carling, Direct Conversion of N-Methoxy-N-methylamides (Weinreb Amides) to Ketones via a Nonclassical Wittig Reaction, *Organic Letters*, 2005, **7**, 1427.
10. S. Liu, P. Jiang, G. Song, R. Liu and H. Zhu, Synthesis and optical properties of a series of thermally stable diphenylanthrazolines, *Dyes and Pigments*, 2009, **81**, 218.
11. Integrated Spectral Database System of Organic Compounds. (Data were obtained from the National Institute of Advanced Industrial Science and Technology (Japan))
12. P. D. Gardner, Phosphorus Acids in Organic Systems. II. "Polyphosphoric Acid" as a Catalyst in the Fries Rearrangement, *Journal of the American Chemical Society*, 1955, **77**, 4674.
13. R. Qiu, G. Zhang, X. Ren, X. Xu, R. Yang, S. Luo and S. Yin, Air-stable titanocene bis(perfluorooctanesulfonate) as a new catalyst for acylation of alcohols, phenols, thiols, and amines under solvent-free condition, *Journal of Organometallic Chemistry*, 2010, **695**, 1182.
